# Supplementary material
Source: Royal Society of Chemistry journal article supplement (doi:10.1039/d6ma00156d)
Supplement: d6ma00156d1.pdf [file d6ma00156d1.pdf]

Supplementary Informations for

**Spin-Selective Orbital Reconfiguration and Colossal Nonlinear Anisotropy  
in Defect-Engineered Atomically Thin Quantum Dots**

Saraf Mohaimen Chowdhury<sup>a</sup>, Salena Akther<sup>b,c</sup>

<sup>a</sup>Department of Electrical and Electronic Engineering, Port City International University,  
Chattogram 4202, Bangladesh

<sup>b</sup>Department of Natural Science, Port City International University, Chattogram 4202, Bangladesh

<sup>c</sup>Department of Mathematics, Chittagong University of Engineering and Technology,  
Chattogram 4349, Bangladesh

## Contents

|                                                                                     |            |
|-------------------------------------------------------------------------------------|------------|
| <b>1 Computational Methods</b>                                                      | <b>S2</b>  |
| <b>2 Structural Parameters</b>                                                      | <b>S4</b>  |
| <b>3 Formation Energies of Charged States</b>                                       | <b>S7</b>  |
| <b>4 Charge Distribution Anisotropy</b>                                             | <b>S8</b>  |
| <b>5 Cross-spin's Non-orthogonality</b>                                             | <b>S9</b>  |
| <b>6 Element-Projected Partial Density of States</b>                                | <b>S10</b> |
| <b>7 Total Density of States</b>                                                    | <b>S13</b> |
| <b>8 Mulliken Atomic Charges and Spin Populations of the Studied Configurations</b> | <b>S16</b> |
| <b>9 Analysis of Vibrational Response</b>                                           | <b>S35</b> |
| <b>10 Energy Landscape under Finite-Temperature Perturbations</b>                   | <b>S37</b> |
| <b>11 Structural Data Availability</b>                                              | <b>S40</b> |
| <b>References</b>                                                                   | <b>S40</b> |

# 1 Computational Methods

The DFT calculation was performed using the hybrid exchange energy of the  $\omega$ B97X-D functional [1], which is expressed as:

$$E_X^{\omega\text{B97X}} = a_{\text{SR}} E_X^{\text{HF,SR}} + (1 - a_{\text{SR}}) E_X^{\text{DFT,SR}} + E_X^{\text{HF,LR}}$$

Where:

- $a_{\text{SR}} = 0.22$  is the fraction of short-range exact (Hartree–Fock) exchange,
- $E_X^{\text{HF,SR}}$  is the short-range Hartree–Fock exchange energy,
- $E_X^{\text{DFT,SR}}$  is the short-range DFT exchange energy,
- $E_X^{\text{HF,LR}}$  is the long-range Hartree–Fock exchange energy.

where the range-separation parameter is:

$$\omega = 0.2 \text{ bohr}^{-1}$$

The LANL2DZ basis set was used, which combines a double- $\zeta$  valence basis with the Los Alamos effective core potential (ECP) [2], to replace inner-core electrons with a simplified potential. The orbital energy gap was derived from the difference between the highest occupied and lowest unoccupied frontier orbitals, and systems with a closed-shell minimum corresponds to  $E_g(\alpha) = E_g(\beta)$ . The binding energies of all structures were calculated using the following equations to quantify the strength of atomic interactions:

$$E_b = \frac{n_m E_m + n_c E_c + n_d E_d - E_t}{n_t} \quad (1)$$

where  $n_m$ ,  $n_c$ ,  $n_d$ , and  $n_t$  are the number of metal atoms, chalcogen atoms, dopant atoms, and the total number of atoms, respectively.  $E_m$ ,  $E_c$ ,  $E_d$ , and  $E_t$  are the corresponding energies.

The directional components of the  $\mathbf{g}$ -tensor were calculated using the GIAO formalism [3], where the rotational  $\mathbf{g}$ -tensor derived from the second-order response of the ground-state energy ( $E$ ) with respect to perturbations by an external magnetic field ( $\vec{B}$ ) applied along the Cartesian axes. Conceptually, this can be expressed as the linear response of the angular momentum expectation value to the applied magnetic field, i.e.,

$$g_{\lambda\eta} \propto \frac{d}{dB_\lambda} \left\langle \Psi(B) \left| \hat{J}_\eta \right| \Psi(B) \right\rangle \Big|_{B=0}$$

where  $\Psi(B)$  is the field-perturbed ground-state wavefunction, and  $\hat{J}_\eta$  is the angular momentum operator. The deviation from the free-electron reference was then obtained for each principal direction as:

$$\Delta g_{ii} = g_{ii} - g_e \quad (2)$$

The static nonlinear components were calculated and reported using the finite-field method [4] within the same theoretical framework. The system's energy under an external electric field  $\mathbf{E}$  can be expanded as:

$$E = E^0 - \mu_i E_i - \frac{1}{2} \alpha_{ij} E_i E_j - \frac{1}{6} \beta_{ijk} E_i E_j E_k - \frac{1}{24} \gamma_{ijkl} E_i E_j E_k E_l + \dots,$$

where  $\mu_i$ ,  $\alpha_{ij}$ ,  $\beta_{ijk}$ , and  $\gamma_{ijkl}$  denote the dipole moment, polarizability, first-order hyperpolarizability, and second-order hyperpolarizability tensors, respectively. The isotropic polarizability was defined as the scalar average

$$\alpha_0 = \frac{1}{3} \text{Tr}(\alpha_{ij}), \quad (3)$$

and the anisotropic polarizability  $\Delta\alpha$  is evaluated as,

$$\Delta\alpha = \sqrt{\frac{1}{2} [(\alpha_{xx} - \alpha_{yy})^2 + (\alpha_{yy} - \alpha_{zz})^2 + (\alpha_{zz} - \alpha_{xx})^2 + 6(\alpha_{xy}^2 + \alpha_{yz}^2 + \alpha_{xz}^2)]} \quad (4)$$

and to capture the anisotropic response of the first- and second-order hyperpolarizabilities specific to the planar geometry of 2D nanoflakes, the hyperpolarizability tensors were decomposed into *in-plane* (parallel,  $x$ - and  $y$ -directions) and *out-of-plane* (perpendicular,  $z$ -direction) components:

$$\beta_{\parallel} = \frac{1}{2}(\beta_{xxx} + \beta_{yyy}), \quad \beta_{\perp} = \beta_{zzz}, \quad (5)$$

$$\gamma_{\parallel} = \frac{1}{2}(\gamma_{xxxx} + \gamma_{yyyy}), \quad \gamma_{\perp} = \gamma_{zzzz}. \quad (6)$$

Projected density of states (PDOS) for  $s$ ,  $p$ , and  $d$  orbitals, as well as for individual atomic groups, was calculated using molecular orbital energies and coefficients. A Gaussian broadening of  $\sigma = 0.28$  eV was applied on a uniform energy grid of 4000 points. Both total and resolved contributions are plotted. States below a  $1 \times 10^{-6}$  a.u. threshold were excluded to avoid numerical noise. Molecular orbital isosurfaces were visualized at  $\pm 0.02$  a.u., and the isovalues for spin density and electron density contours were set to 0.0004 a.u. Post-processing of the orbital wavefunctions was carried out using the *Multiwfn* program, and all real-space numerical integrations were performed using *Python*.

## 2 Structural Parameters

### GaS Nanoflake

Maximum diameter ( $D_{\max}$ ): 12.733 Å  
Corrugation: 0.000 Å  
Radius of gyration ( $R_g$ ): 5.021 Å  
Average bond length: 2.345 Å  
Smallest bond length: 2.130 Å  
Largest bond length: 2.625 Å

### GaS:Zr Nanoflake

Maximum diameter ( $D_{\max}$ ): 13.110 Å  
Corrugation: 0.000 Å  
Radius of gyration ( $R_g$ ): 5.034 Å  
Average bond length: 2.366 Å  
Smallest bond length: 2.130 Å  
Largest bond length: 2.764 Å  
Dopant-neighbor bond lengths (Zr–S): 2.558, 2.523, 2.558 Å

---

### GaSe Nanoflake

Maximum diameter ( $D_{\max}$ ): 13.217 Å  
Corrugation: 0.000 Å  
Radius of gyration ( $R_g$ ): 5.270 Å  
Average bond length: 2.470 Å  
Smallest bond length: 2.259 Å  
Largest bond length: 2.753 Å

### GaSe:Mo Nanoflake

Maximum diameter ( $D_{\max}$ ): 13.260 Å  
Corrugation: 0.000 Å  
Radius of gyration ( $R_g$ ): 5.267 Å  
Average bond length: 2.466 Å  
Smallest bond length: 2.264 Å  
Largest bond length: 2.786 Å  
Dopant-neighbor bond lengths (Mo–Se): 2.527, 2.517, 2.527 Å

---

### GaTe Nanoflake

Maximum diameter ( $D_{\max}$ ): 14.075 Å  
Corrugation: 0.000 Å  
Radius of gyration ( $R_g$ ): 5.656 Å  
Average bond length: 2.659 Å  
Smallest bond length: 2.455 Å  
Largest bond length: 2.954 Å

### GaTe:Mo Nanoflake

Maximum diameter ( $D_{\max}$ ): 13.713 Å  
Corrugation: 0.000 Å  
Radius of gyration ( $R_g$ ): 5.605 Å  
Average bond length: 2.624 Å  
Smallest bond length: 2.538 Å  
Largest bond length: 2.750 Å  
Dopant-neighbor bond lengths (Mo–Te): 2.750, 2.750, 2.750 Å

---

**InS Nanoflake**

Maximum diameter ( $D_{\max}$ ): 13.631 Å  
Corrugation: 0.000 Å  
Radius of gyration ( $R_g$ ): 5.369 Å  
Average bond length: 2.495 Å  
Smallest bond length: 2.293 Å  
Largest bond length: 2.740 Å

**InS:Zr Nanoflake**

Maximum diameter ( $D_{\max}$ ): 13.662 Å  
Corrugation: 0.000 Å  
Radius of gyration ( $R_g$ ): 5.397 Å  
Average bond length: 2.504 Å  
Smallest bond length: 2.294 Å  
Largest bond length: 2.750 Å  
Dopant-neighbor bond lengths (Zr-S): 2.432, 2.432, 2.432 Å

---

**InSe Nanoflake**

Maximum diameter ( $D_{\max}$ ): 14.128 Å  
Corrugation: 0.000 Å  
Radius of gyration ( $R_g$ ): 5.627 Å  
Average bond length: 2.628 Å  
Smallest bond length: 2.421 Å  
Largest bond length: 2.890 Å

**InSe:Mo Nanoflake**

Maximum diameter ( $D_{\max}$ ): 13.740 Å  
Corrugation: 0.000 Å  
Radius of gyration ( $R_g$ ): 5.526 Å  
Average bond length: 2.585 Å  
Smallest bond length: 2.483 Å  
Largest bond length: 2.733 Å  
Dopant-neighbor bond lengths (Mo-Se): 2.663, 2.637, 2.636 Å

---

**InTe Nanoflake**

Maximum diameter ( $D_{\max}$ ): 14.990 Å  
Corrugation: 0.000 Å  
Radius of gyration ( $R_g$ ): 6.017 Å  
Average bond length: 2.822 Å  
Smallest bond length: 2.609 Å  
Largest bond length: 3.113 Å

**InTe:Mo Nanoflake**

Maximum diameter ( $D_{\max}$ ): 14.451 Å  
Corrugation: 0.000 Å  
Radius of gyration ( $R_g$ ): 5.895 Å  
Average bond length: 2.768 Å  
Smallest bond length: 2.691 Å  
Largest bond length: 2.874 Å  
Dopant-neighbor bond lengths (Mo-Te): 2.788, 2.788, 2.788 Å

---

**TlS Nanoflake**

Maximum diameter ( $D_{\max}$ ): 14.292 Å  
Corrugation: 0.000 Å  
Radius of gyration ( $R_g$ ): 5.646 Å  
Average bond length: 2.625 Å  
Smallest bond length: 2.406 Å  
Largest bond length: 2.891 Å

**TlS:Mn Nanoflake**

Maximum diameter ( $D_{\max}$ ): 14.298 Å  
Corrugation: 0.000 Å  
Radius of gyration ( $R_g$ ): 5.517 Å  
Average bond length: 2.587 Å  
Smallest bond length: 2.391 Å  
Largest bond length: 2.920 Å  
Dopant-neighbor bond lengths (Mn–S): 2.391, 2.449, 2.391 Å

---

**TlSe Nanoflake**

Maximum diameter ( $D_{\max}$ ): 14.748 Å  
Corrugation: 0.000 Å  
Radius of gyration ( $R_g$ ): 5.888 Å  
Average bond length: 2.748 Å  
Smallest bond length: 2.530 Å  
Largest bond length: 3.022 Å

**TlSe:Mn Nanoflake**

Maximum diameter ( $D_{\max}$ ): 14.585 Å  
Corrugation: 0.000 Å  
Radius of gyration ( $R_g$ ): 5.756 Å  
Average bond length: 2.709 Å  
Smallest bond length: 2.495 Å  
Largest bond length: 3.029 Å  
Dopant-neighbor bond lengths (Mn–Se): 2.525, 2.495, 2.525 Å

---

**TlTe Nanoflake**

Maximum diameter ( $D_{\max}$ ): 15.586 Å  
Corrugation: 0.000 Å  
Radius of gyration ( $R_g$ ): 6.269 Å  
Average bond length: 2.937 Å  
Smallest bond length: 2.715 Å  
Largest bond length: 3.236 Å

**TlTe:Mn Nanoflake**

Maximum diameter ( $D_{\max}$ ): 15.950 Å  
Corrugation: 0.000 Å  
Radius of gyration ( $R_g$ ): 6.174 Å  
Average bond length: 2.912 Å  
Smallest bond length: 2.670 Å  
Largest bond length: 3.269 Å  
Dopant-neighbor bond lengths (Mn–Te): 2.671, 2.693, 2.670 Å

### 3 Formation Energies of Charged States

Table S1: Formation energies, energy differences, and spin states of the considered structures in their charged configurations.

| Host                             | Dp | $E_{\text{form}}^{(q)}$ (eV) | $\Delta E$ (eV) | $M$ |
|----------------------------------|----|------------------------------|-----------------|-----|
| Ga <sub>9</sub> S <sub>12</sub>  | Zr | -3.14                        | +1.64           | 6   |
| Ga <sub>9</sub> Se <sub>12</sub> | Mo | -6.01                        | -1.11           | 6   |
| Ga <sub>9</sub> Te <sub>12</sub> | Mo | -6.11                        | -1.57           | 6   |
| In <sub>9</sub> S <sub>12</sub>  | Zr | -2.97                        | +2.20           | 4   |
| In <sub>9</sub> Se <sub>12</sub> | Mo | -6.01                        | -1.27           | 6   |
| In <sub>9</sub> Te <sub>12</sub> | Mo | -6.12                        | -1.24           | 6   |
| Tl <sub>9</sub> S <sub>12</sub>  | Mn | -4.70                        | +0.14           | 7   |
| Tl <sub>9</sub> Se <sub>12</sub> | Mn | -3.76                        | +0.44           | 9   |
| Tl <sub>9</sub> Te <sub>12</sub> | Mn | -3.46                        | +1.16           | 7   |

We have computed the formation energies of the pristine and TM-substituted structures in multiple charge states, specifically  $q = \pm 1$  and  $q = \pm 2$ . For  $q = \pm 1$ , the system adopts the spin of the charged state, whereas for  $q = \pm 2$ , the original spin configuration of the neutral system is preserved. We find that the anionic state with  $q = -2$  exhibits the lowest formation energy for both pristine and doped systems. The charged state formation energy ( $E_{\text{form}}^{(q)}$ ) is defined as:

$$E_{\text{form}}^{-2} = E^{-2}(\text{M}_9\text{TMX}_{12}) - E^{-2}(\text{M}_{10}\text{X}_{12}) + \mu_M - \mu_{\text{TM}} \quad (7)$$

where  $E^{-2}(\text{M}_9\text{TMX}_{12})$  is the total energy of the doped system at charge  $-2$ ,  $E^{-2}(\text{M}_{10}\text{X}_{12})$  is the total energy of the pristine system at charge  $-2$ ,  $\mu_M$  is the chemical potential of the removed host atom, and  $\mu_{\text{TM}}$  is the chemical potential of the inserted dopant atom.

As presented in Table S1,  $E_{\text{form}}^{(q)}$  increases by 1.11, 1.57, 1.27, and 1.24 eV for Ga<sub>9</sub>MoSe<sub>12</sub>, Ga<sub>9</sub>MoTe<sub>12</sub>, In<sub>9</sub>MoSe<sub>12</sub>, and In<sub>9</sub>MoTe<sub>12</sub>, respectively, whereas it decreases for the rest compared to the neutral states. Larger spin differences relative to the neutral system are observed for Ga<sub>9</sub>ZrS<sub>12</sub> (sextet), In<sub>9</sub>ZrS<sub>12</sub> (quartet), Tl<sub>9</sub>MnSe<sub>12</sub> (nonet), and Tl<sub>9</sub>MnTe<sub>12</sub> (septet); however, these differences do not qualitatively affect the observed stability trends. Furthermore, Mulliken population analysis of the anionic systems (presented in Table S13 – S21) shows that substitutional transition-metal dopants (Zr, Mo, Mn) adopt lower effective charges than host cations and carry dominant spin densities ( $\sim 1.9 - 4.8\mu_B$ ), which indicates strong localization of unpaired d-electrons at the dopant sites. The surrounding atoms exhibit noticeable changes in charge and spin density, confirming that single-site perturbation modifies the local electronic structure of the quantum dots.

## 4 Charge Distribution Anisotropy

Table S2: Traceless quadrupole tensor components of the quantum dots in atomic units (1 a.u. = 4.486551 Debye·Å).

| System                             | $Q_{xx}$ | $Q_{yy}$ | $Q_{zz}$ | $Q_{xy}$ | $Q_{xz}$ | $Q_{yz}$ |
|------------------------------------|----------|----------|----------|----------|----------|----------|
| Ga <sub>10</sub> S <sub>12</sub>   | 10.1725  | -5.0844  | -5.0880  | 0.0000   | 0.0000   | 0.0000   |
| Ga <sub>9</sub> ZrS <sub>12</sub>  | 8.2539   | -10.1990 | 1.9451   | 0.0000   | 0.0000   | 0.0000   |
| Ga <sub>10</sub> Se <sub>12</sub>  | 8.9102   | -4.4685  | -4.4418  | 0.0000   | 0.0000   | 0.0000   |
| Ga <sub>9</sub> MoSe <sub>12</sub> | 7.5705   | -9.3135  | 1.7430   | 0.0000   | 0.0000   | 0.0000   |
| Ga <sub>10</sub> Te <sub>12</sub>  | 6.5891   | -3.2894  | -3.2997  | 0.0000   | 0.0000   | 0.0000   |
| Ga <sub>9</sub> MoTe <sub>12</sub> | 4.0811   | -2.0171  | -2.0640  | 0.0000   | 0.0000   | 0.0000   |
| In <sub>10</sub> S <sub>12</sub>   | -6.7482  | -6.7669  | 13.5152  | -0.0062  | 0.0000   | 0.0000   |
| In <sub>9</sub> ZrS <sub>12</sub>  | -6.4365  | -6.4564  | 12.8929  | -0.0033  | 0.0000   | 0.0000   |
| In <sub>10</sub> Se <sub>12</sub>  | -5.9712  | -5.9050  | 11.8762  | -0.0032  | 0.0000   | 0.0000   |
| In <sub>9</sub> MoSe <sub>12</sub> | -7.3918  | -0.4096  | 7.8014   | -0.1254  | 0.0000   | 0.0000   |
| In <sub>10</sub> Te <sub>12</sub>  | -4.4548  | -4.4836  | 8.9383   | -0.0152  | 0.0000   | 0.0000   |
| In <sub>9</sub> MoTe <sub>12</sub> | -2.8925  | -2.8620  | 5.7545   | -0.0385  | 0.0000   | 0.0000   |
| Tl <sub>10</sub> S <sub>12</sub>   | -85.1527 | -85.1069 | -75.4043 | -0.0192  | 0.0000   | 0.0000   |
| Tl <sub>9</sub> MnS <sub>12</sub>  | -8.7045  | 2.9022   | 5.8023   | -0.0325  | 0.0000   | 0.0000   |
| Tl <sub>10</sub> Se <sub>12</sub>  | 5.2459   | -2.7170  | -2.5289  | 0.0000   | 0.0000   | 0.0000   |
| Tl <sub>9</sub> MnSe <sub>12</sub> | 4.4097   | -0.5362  | -3.8735  | 0.0000   | 0.0000   | 0.0000   |
| Tl <sub>10</sub> Te <sub>12</sub>  | -1.2167  | -1.1672  | 2.3839   | -0.0282  | 0.0000   | 0.0000   |
| Tl <sub>9</sub> MnTe <sub>12</sub> | -8.6956  | 12.0515  | -3.3559  | 0.0205   | 0.0000   | 0.0000   |

### Supplementary Notes

To capture the spatial anisotropy of electron density distribution in the nanoflakes, we calculated the traceless quadrupole tensor components, to identify higher-order deviations from spherical symmetry. As given in Table S2, data from quadrupole moments showing how the electron cloud is stretched or compressed along specific Cartesian directions, from which we can characterize directional polarization patterns that were not apparent in dipole analysis alone. The sum over all components would be zero, and the positive or negative value explains how the density spreads or contracts in each principle axis. For the pristine Ga<sub>10</sub>X<sub>12</sub> configurations, the elongation or distribution is more diffuse along the x-axis, while In<sub>10</sub>X<sub>12</sub> and Tl<sub>10</sub>X<sub>12</sub> primarily showed compression in the in-plane-axis. Particularly, Tl<sub>10</sub>S<sub>12</sub> shows huge contraction of wavefunctions most likely due to higher localization of s-orbitals just above the Fermi level (being non-directional but energetically accessible), which creates such concentration in real space. The distribution is then extends in the out-of-plane direction for most of the nanodots after substitution with TM.

## 5 Cross-spin's Non-orthogonality

Table S3: Cross-spin overlap integrals and normalized overlaps for all systems.

| System                             | Overlap pair          | Overlap integral         | Normalized overlap |
|------------------------------------|-----------------------|--------------------------|--------------------|
| Ga <sub>9</sub> ZrS <sub>12</sub>  | H $\alpha$ -H $\beta$ | $5.0684 \times 10^{-2}$  | 0.050700           |
|                                    | L $\alpha$ -L $\beta$ | $2.0665 \times 10^{-1}$  | 0.207050           |
| Ga <sub>9</sub> MoSe <sub>12</sub> | H $\alpha$ -H $\beta$ | $9.9927 \times 10^{-1}$  | 0.999907           |
|                                    | L $\alpha$ -L $\beta$ | $-6.1680 \times 10^{-8}$ | 0.000000           |
| Ga <sub>9</sub> MoTe <sub>12</sub> | H $\alpha$ -H $\beta$ | $-9.5054 \times 10^{-4}$ | 0.000951           |
|                                    | L $\alpha$ -L $\beta$ | $1.3611 \times 10^{-1}$  | 0.136262           |
| In <sub>9</sub> ZrS <sub>12</sub>  | H $\alpha$ -H $\beta$ | $9.9880 \times 10^{-1}$  | 0.999999           |
|                                    | L $\alpha$ -L $\beta$ | $3.7337 \times 10^{-3}$  | 0.003770           |
| In <sub>9</sub> MoSe <sub>12</sub> | H $\alpha$ -H $\beta$ | $-5.0716 \times 10^{-2}$ | 0.050770           |
|                                    | L $\alpha$ -L $\beta$ | $-2.9780 \times 10^{-4}$ | 0.000298           |
| In <sub>9</sub> MoTe <sub>12</sub> | H $\alpha$ -H $\beta$ | $1.1492 \times 10^{-3}$  | 0.001151           |
|                                    | L $\alpha$ -L $\beta$ | $9.0809 \times 10^{-4}$  | 0.000910           |
| Tl <sub>9</sub> MnS <sub>12</sub>  | H $\alpha$ -H $\beta$ | $9.9863 \times 10^{-1}$  | 0.999421           |
|                                    | L $\alpha$ -L $\beta$ | $1.9058 \times 10^{-1}$  | 0.190898           |
| Tl <sub>9</sub> MnSe <sub>12</sub> | H $\alpha$ -H $\beta$ | $-2.6589 \times 10^{-1}$ | 0.266197           |
|                                    | L $\alpha$ -L $\beta$ | $1.7976 \times 10^{-6}$  | 0.000002           |
| Tl <sub>9</sub> MnTe <sub>12</sub> | H $\alpha$ -H $\beta$ | $9.9477 \times 10^{-1}$  | 0.995865           |
|                                    | L $\alpha$ -L $\beta$ | $2.4923 \times 10^{-4}$  | 0.000250           |

## 6 Element-Projected Partial Density of States

**Figure S1.** Element-projected partial density of states plotted for the pristine and doped configurations comprises the total contribution from each group of atoms. The TM- $X_3$  hybridization strength vastly depends on the host structure. Moreover, electronic contribution from the host-metal (Ga, In) reduces upon dopant incorporation, whereas in TI-based systems, the host metal remains dominant, that contributes a major portion of the states near the Fermi level.

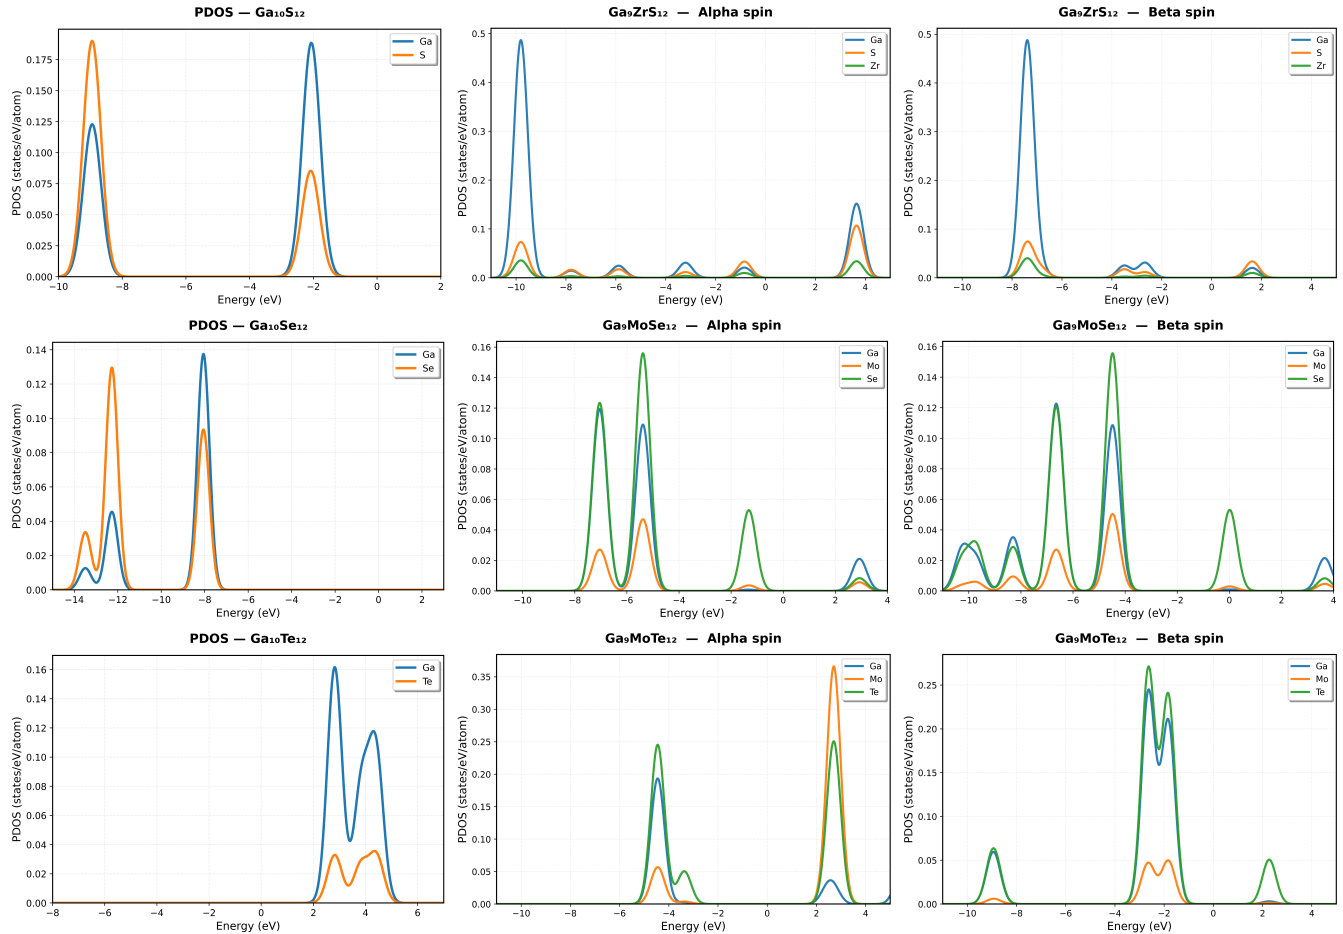

Figure S1(a): Element-projected PDOS for Ga-based systems. The plots correspond to pristine  $\text{Ga}_{10}\text{X}_{12}$ , Zr-doped  $\text{Ga}_9\text{S}_{12}$ , and Mo-doped  $\text{Ga}_9(\text{Se}/\text{Te})_{12}$  configurations. Specific compositions are indicated within each panel.

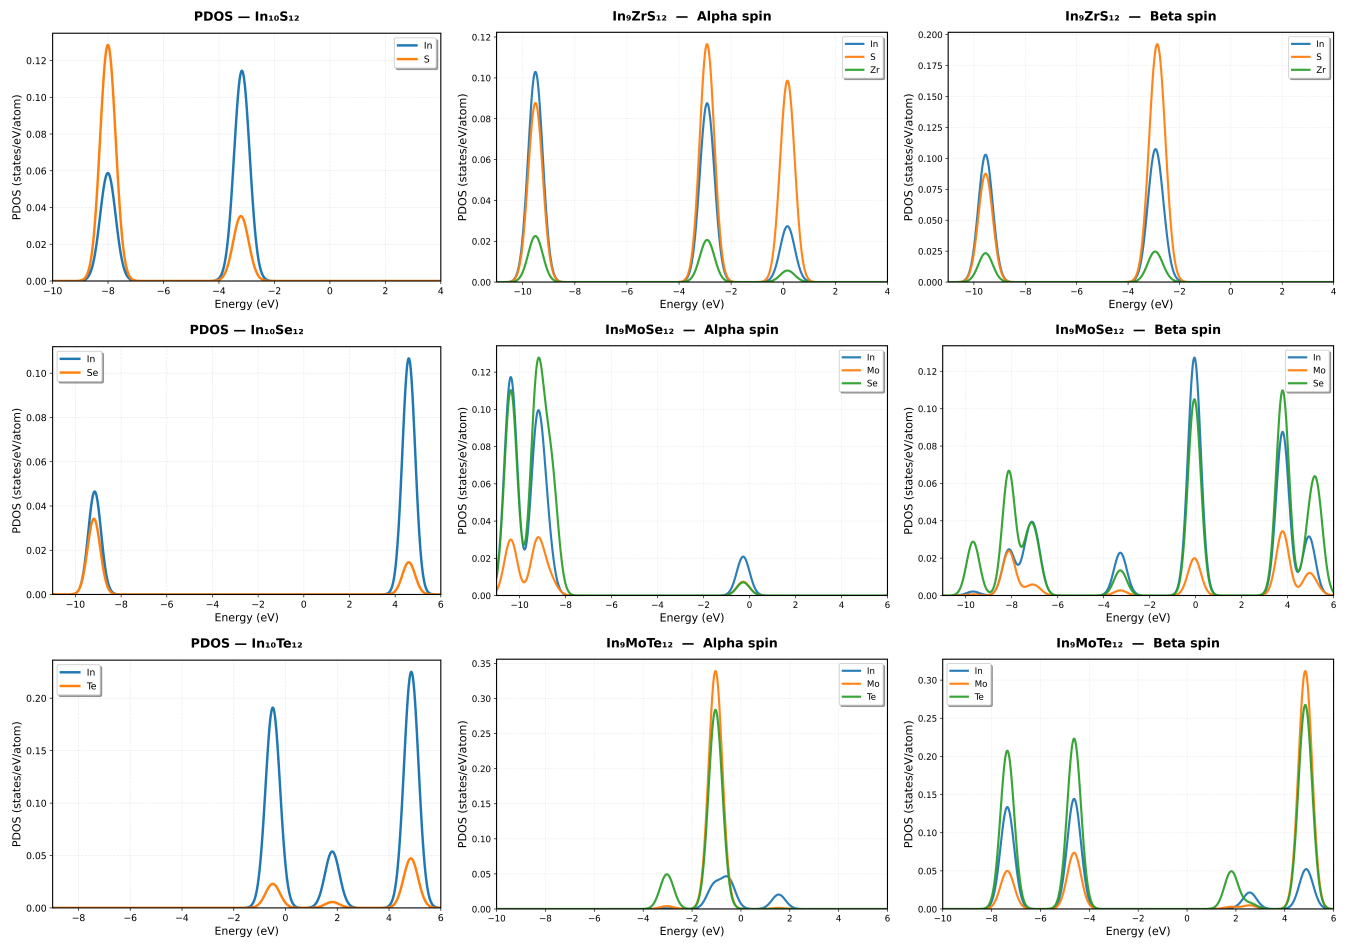

Figure S1(b): Element-projected PDOS for In-based systems. The plots correspond to pristine  $\text{In}_{10}\text{X}_{12}$ , Zr-doped  $\text{In}_9\text{S}_{12}$ , and Mo-doped  $\text{In}_9(\text{Se}/\text{Te})_{12}$  configurations. Specific compositions are indicated within each panel.

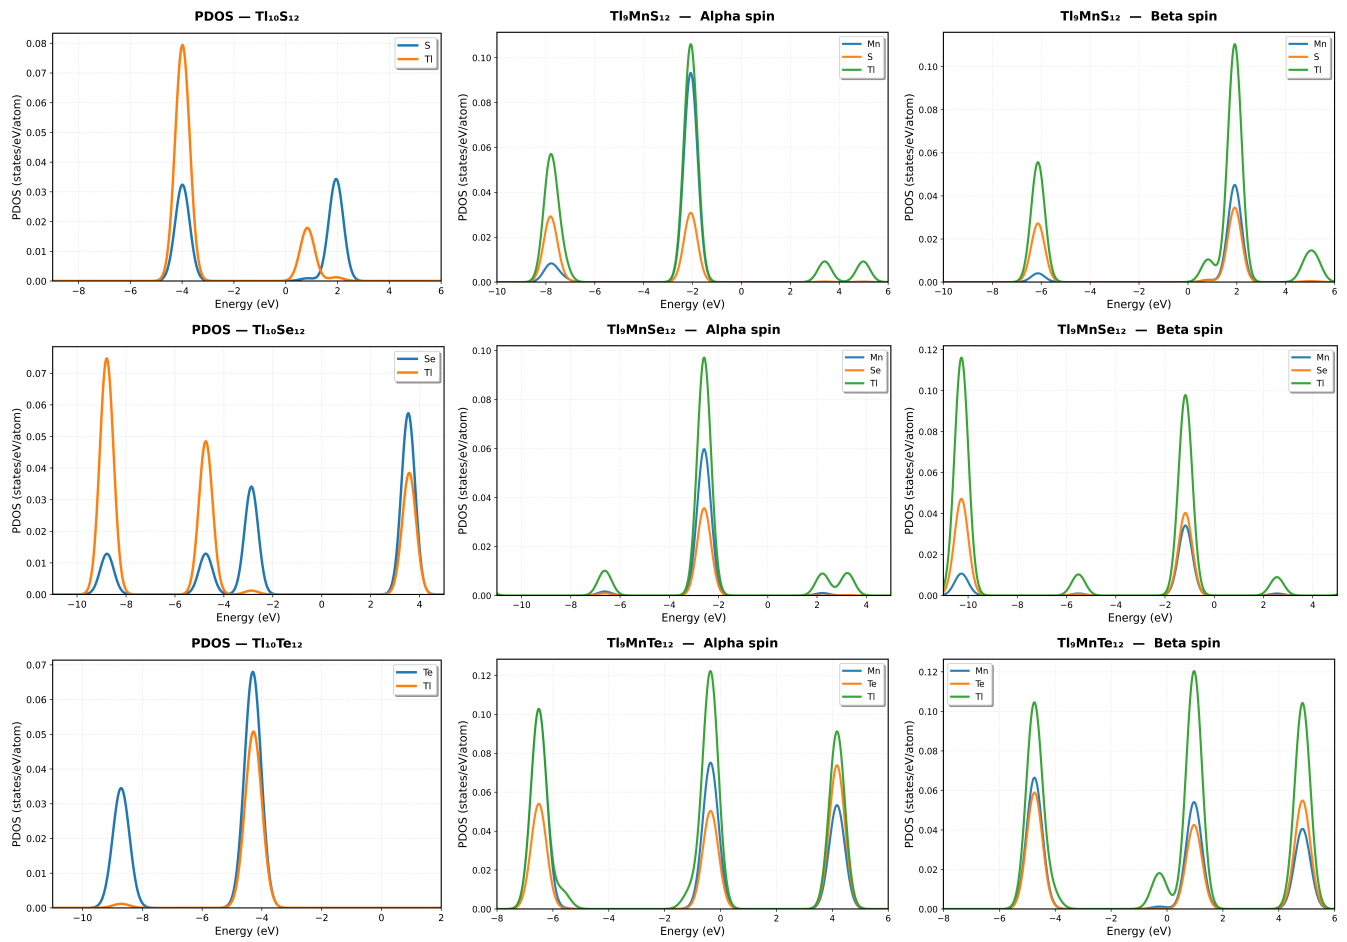

Figure S1(c): Element-projected PDOS for TI-based systems. The plots correspond to pristine  $\text{Tl}_{10}\text{X}_{12}$ , and Mn-doped  $\text{Tl}_9(\text{S}/\text{Se}/\text{Te})_{12}$  configurations. Specific compositions are indicated within each panel.

## Supplementary Notes

The element-projected PDOS provides a more detail look on understanding at how each group of atoms contributes to the potential landscape. In Mo-doped  $\text{Ga}_9\text{Te}_{12}$  and  $\text{In}_9\text{Te}_{12}$ , we can see that intensity from the dopant is high compared to other configurations. This is a key factor that leads to higher distribution of spin density in the configurations. But in case of Mn-substituted  $\text{Tl}_9\text{X}_{12}$  configurations, the reduced orbital intensity from the dopant disrupts local symmetry, which results in non-uniform orbital distributions, a large nonlinear response, and phase inversion behavior.

# 7 Total Density of States

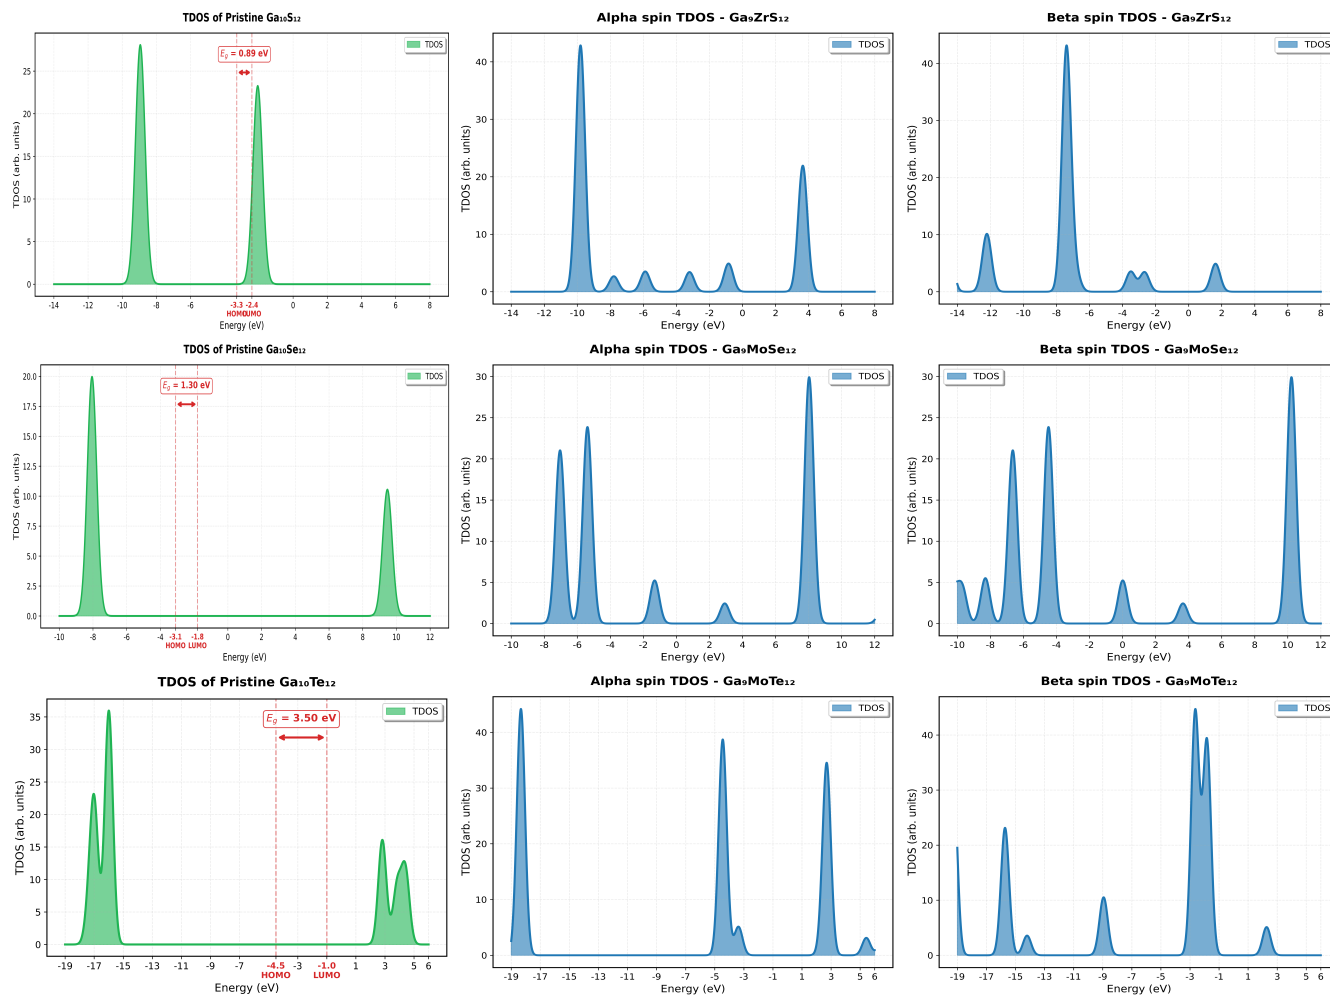

Figure S2(a):

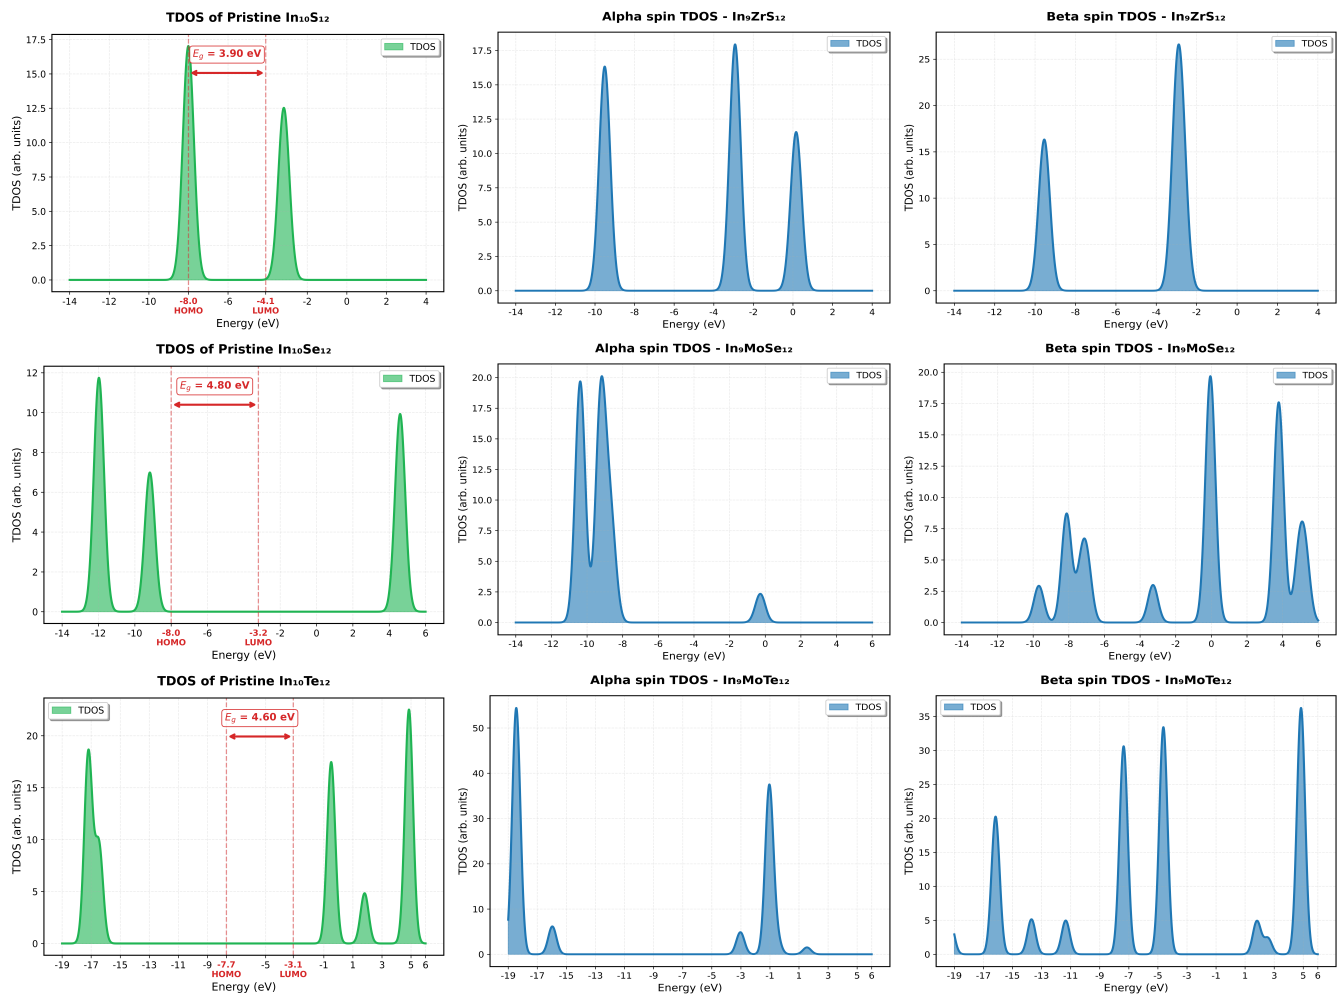

Figure S2(b):

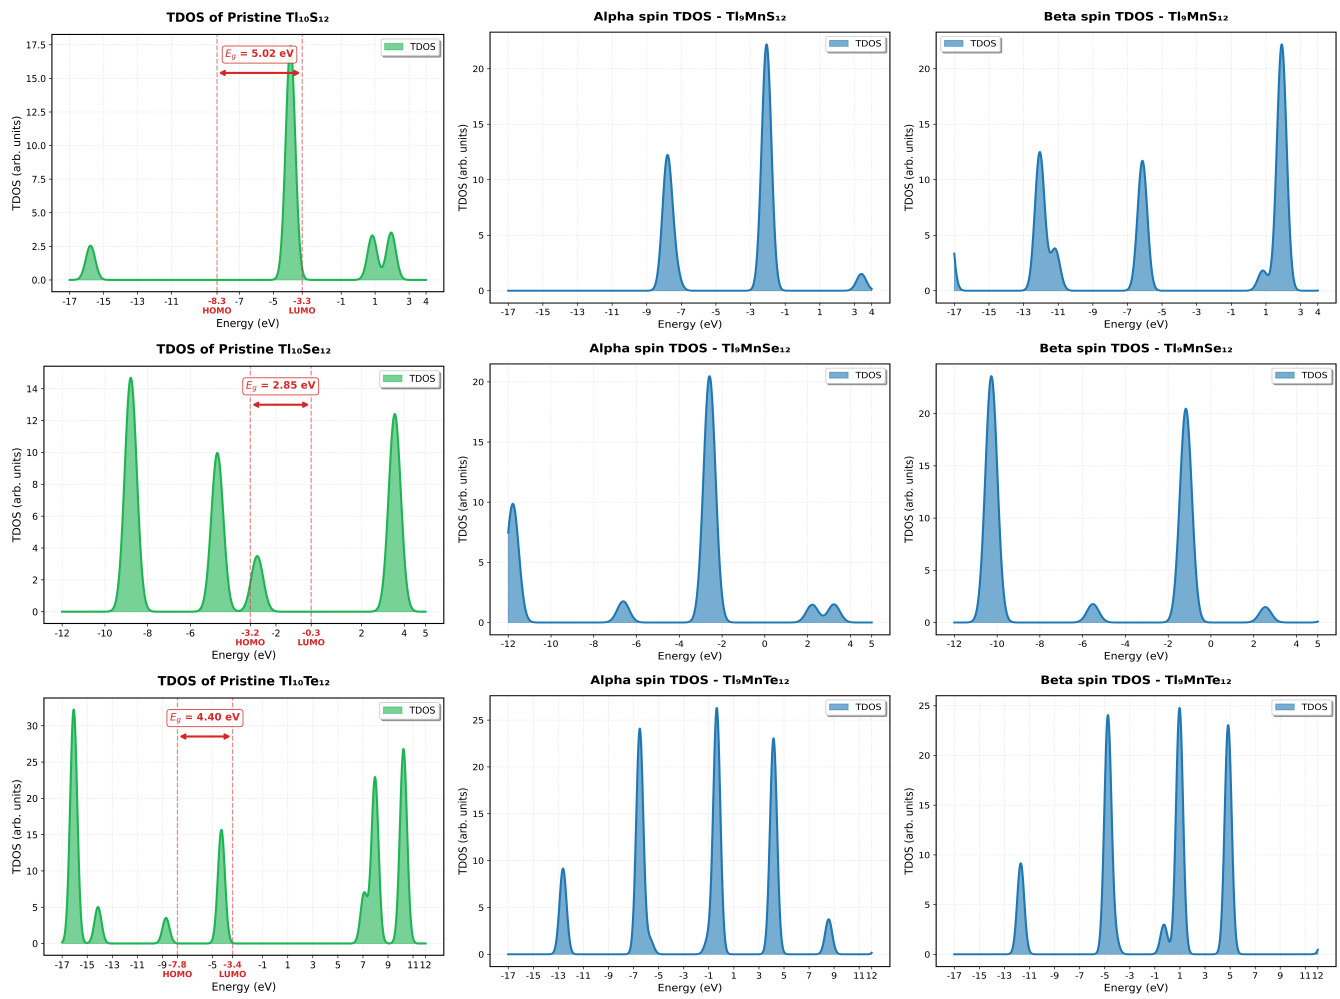

Figure S2(c):

## 8 Mulliken Atomic Charges and Spin Populations of the Studied Configurations

Mulliken population analysis is used here as a qualitative indicator of charge redistribution and spin localization, that supports the real-space orbital and spin-density visualizations. The Mulliken charge and spin-density analysis exhibits that pristine group-13 chalcogenide quantum dots shows a systematic reduction in ionicity from S to Te. This indicates an increment in more covalence-like behavior and electronic softness of the host framework. Upon transition-metal doping, the dopant atom acquires partial positive charge and is the main source of magnetic moments in the electronic structure. Such center-substitution causes partial charge transfer, higher covalent hybridization, and high spin polarization on neighboring host atoms. It is also observed that, when the host structure contains heavier chalcogen, the delocalization of spin redistribution increases (because their orbitals are more diffuse, as per Fig. S1) due to the enhanced p–d hybridization and spin-selective charge rehybridization. Moreover, presence of dopant changes the local charge distribution as some of the host atoms become less negative (or more positive), which indicates charge reorganizations in the configuration. It is also evident that some host atoms gain spin but a minor change in electronic charge is observed, which suggests that spin-selective charge rehybridization becomes much higher in heavier chalcogen hosts due to their increased electronic softness. It is also observed from our analysis that while the dopant identity controls the magnitude of magnetization, the host orbital-interaction governs its spatial extent (i.e., distribution), which establishes a clear structure-property relationship for tuning magnetism in such low-dimensional systems.

Table S4: Mulliken charges for pristine Ga<sub>10</sub>S<sub>12</sub> QD (Table A) and Zr-doped Ga<sub>9</sub>S<sub>12</sub> QD (Table B) with spin densities.

| Atom | Pristine (A) |            | Doped (B) |            |                          |
|------|--------------|------------|-----------|------------|--------------------------|
|      | Element      | Charge (e) | Element   | Charge (e) | Spin Density ( $\mu_B$ ) |
| 1    | Ga           | 0.708      | Ga        | 0.697      | 0.016                    |
| 2    | S            | -0.688     | S         | -0.731     | -0.027                   |
| 3    | Ga           | 0.708      | Ga        | 0.745      | 0.021                    |
| 4    | S            | -0.540     | S         | -0.524     | 0.014                    |
| 5    | Ga           | 0.516      | Ga        | 0.503      | 0.001                    |
| 6    | S            | -0.540     | S         | -0.560     | 0.010                    |
| 7    | S            | -0.486     | S         | -0.716     | -0.025                   |
| 8    | Ga           | 0.708      | Ga        | 0.745      | 0.021                    |
| 9    | S            | -0.688     | S         | -0.731     | -0.027                   |
| 10   | Ga           | 0.963      | Zr        | 1.076      | 1.935                    |
| 11   | Ga           | 0.708      | Ga        | 0.697      | 0.016                    |
| 12   | S            | -0.540     | S         | -0.560     | 0.010                    |
| 13   | Ga           | 0.516      | Ga        | 0.503      | 0.001                    |
| 14   | S            | -0.540     | S         | -0.524     | 0.014                    |
| 15   | S            | -0.485     | S         | -0.486     | 0.017                    |
| 16   | Ga           | 0.708      | Ga        | 0.751      | 0.035                    |
| 17   | S            | -0.688     | S         | -0.759     | -0.027                   |
| 18   | S            | -0.485     | S         | -0.486     | 0.017                    |
| 19   | Ga           | 0.708      | Ga        | 0.751      | 0.035                    |
| 20   | S            | -0.540     | S         | -0.475     | 0.106                    |
| 21   | Ga           | 0.516      | Ga        | 0.562      | 0.733                    |
| 22   | S            | -0.540     | S         | -0.475     | 0.106                    |

Table S5: Mulliken charges for pristine Ga<sub>10</sub>Se<sub>12</sub> QD (Table A) and Mo-doped Ga<sub>9</sub>Se<sub>12</sub> QD (Table B) with spin densities.

| Atom | Pristine (A) |            | Doped (B) |            |                          |
|------|--------------|------------|-----------|------------|--------------------------|
|      | Element      | Charge (e) | Element   | Charge (e) | Spin Density ( $\mu_B$ ) |
| 1    | Ga           | 0.547      | Ga        | 0.523      | 0.014                    |
| 2    | Se           | -0.562     | Se        | -0.513     | -0.012                   |
| 3    | Ga           | 0.547      | Ga        | 0.544      | 0.011                    |
| 4    | Se           | -0.458     | Se        | -0.479     | 0.014                    |
| 5    | Ga           | 0.443      | Ga        | 0.419      | 0.001                    |
| 6    | Se           | -0.458     | Se        | -0.455     | 0.008                    |
| 7    | Se           | -0.320     | Se        | -0.348     | 0.015                    |
| 8    | Ga           | 0.547      | Ga        | 0.544      | 0.011                    |
| 9    | Se           | -0.562     | Se        | -0.513     | -0.012                   |
| 10   | Ga           | 0.784      | Mo        | 0.687      | 3.838                    |
| 11   | Ga           | 0.547      | Ga        | 0.523      | 0.014                    |
| 12   | Se           | -0.458     | Se        | -0.455     | 0.008                    |
| 13   | Ga           | 0.443      | Ga        | 0.419      | 0.001                    |
| 14   | Se           | -0.458     | Se        | -0.479     | 0.014                    |
| 15   | Se           | -0.319     | Se        | -0.351     | 0.014                    |
| 16   | Ga           | 0.547      | Ga        | 0.568      | 0.022                    |
| 17   | Se           | -0.562     | Se        | -0.625     | 0.069                    |
| 18   | Se           | -0.319     | Se        | -0.351     | 0.014                    |
| 19   | Ga           | 0.547      | Ga        | 0.568      | 0.022                    |
| 20   | Se           | -0.458     | Se        | -0.343     | 0.139                    |
| 21   | Ga           | 0.443      | Ga        | 0.460      | 0.656                    |
| 22   | Se           | -0.458     | Se        | -0.343     | 0.139                    |

Table S6: Mulliken charges for pristine Ga<sub>10</sub>Te<sub>12</sub> QD (Table A) and Mo-doped Ga<sub>9</sub>Te<sub>12</sub> QD (Table B) with spin densities.

| Atom | Pristine (A) |            | Doped (B) |            |                          |
|------|--------------|------------|-----------|------------|--------------------------|
|      | Element      | Charge (e) | Element   | Charge (e) | Spin Density ( $\mu_B$ ) |
| 1    | Ga           | 0.258      | Ga        | 0.255      | 0.017                    |
| 2    | Te           | -0.352     | Te        | -0.321     | 0.010                    |
| 3    | Ga           | 0.257      | Ga        | 0.255      | 0.017                    |
| 4    | Te           | -0.302     | Te        | -0.214     | 0.151                    |
| 5    | Ga           | 0.356      | Ga        | 0.268      | 0.408                    |
| 6    | Te           | -0.302     | Te        | -0.214     | 0.150                    |
| 7    | Te           | -0.074     | Te        | -0.136     | 0.013                    |
| 8    | Ga           | 0.257      | Ga        | 0.255      | 0.017                    |
| 9    | Te           | -0.352     | Te        | -0.321     | 0.010                    |
| 10   | Ga           | 0.475      | Mo        | 0.323      | 4.707                    |
| 11   | Ga           | 0.258      | Ga        | 0.255      | 0.017                    |
| 12   | Te           | -0.302     | Te        | -0.214     | 0.150                    |
| 13   | Ga           | 0.356      | Ga        | 0.268      | 0.408                    |
| 14   | Te           | -0.302     | Te        | -0.214     | 0.151                    |
| 15   | Te           | -0.073     | Te        | -0.136     | 0.013                    |
| 16   | Ga           | 0.257      | Ga        | 0.254      | 0.017                    |
| 17   | Te           | -0.351     | Te        | -0.319     | 0.009                    |
| 18   | Te           | -0.073     | Te        | -0.136     | 0.013                    |
| 19   | Ga           | 0.257      | Ga        | 0.254      | 0.017                    |
| 20   | Te           | -0.302     | Te        | -0.213     | 0.149                    |
| 21   | Ga           | 0.356      | Ga        | 0.267      | 0.410                    |
| 22   | Te           | -0.302     | Te        | -0.213     | 0.149                    |

Table S7: Mulliken charges for pristine In<sub>10</sub>S<sub>12</sub> QD (Table A) and Zr-doped In<sub>9</sub>S<sub>12</sub> QD (Table B) with spin densities.

| Atom | Pristine (A) |            | Doped (B) |            |                          |
|------|--------------|------------|-----------|------------|--------------------------|
|      | Element      | Charge (e) | Element   | Charge (e) | Spin Density ( $\mu_B$ ) |
| 1    | In           | 0.857      | In        | 0.848      | 0.000                    |
| 2    | S            | -0.780     | S         | -0.782     | -0.014                   |
| 3    | In           | 0.857      | In        | 0.848      | 0.000                    |
| 4    | S            | -0.618     | S         | -0.615     | -0.001                   |
| 5    | In           | 0.550      | In        | 0.549      | 0.000                    |
| 6    | S            | -0.618     | S         | -0.615     | -0.001                   |
| 7    | S            | -0.614     | S         | -0.626     | 0.001                    |
| 8    | In           | 0.857      | In        | 0.848      | 0.000                    |
| 9    | S            | -0.780     | S         | -0.782     | -0.014                   |
| 10   | In           | 1.101      | Zr        | 1.177      | 1.048                    |
| 11   | In           | 0.857      | In        | 0.848      | 0.000                    |
| 12   | S            | -0.618     | S         | -0.615     | -0.001                   |
| 13   | In           | 0.550      | In        | 0.549      | 0.000                    |
| 14   | S            | -0.619     | S         | -0.615     | -0.001                   |
| 15   | S            | -0.614     | S         | -0.626     | 0.001                    |
| 16   | In           | 0.857      | In        | 0.848      | 0.000                    |
| 17   | S            | -0.780     | S         | -0.782     | -0.014                   |
| 18   | S            | -0.614     | S         | -0.626     | 0.001                    |
| 19   | In           | 0.857      | In        | 0.848      | 0.000                    |
| 20   | S            | -0.618     | S         | -0.615     | -0.001                   |
| 21   | In           | 0.550      | In        | 0.549      | 0.000                    |
| 22   | S            | -0.618     | S         | -0.615     | -0.001                   |

Table S8: Mulliken charges for pristine In<sub>10</sub>Se<sub>12</sub> QD (Table A) and Mo-doped In<sub>9</sub>Se<sub>12</sub> QD (Table B) with spin densities.

| Atom | Pristine (A) |            | Doped (B) |            |                          |
|------|--------------|------------|-----------|------------|--------------------------|
|      | Element      | Charge (e) | Element   | Charge (e) | Spin Density ( $\mu_B$ ) |
| 1    | In           | 0.689      | In        | 0.687      | 0.027                    |
| 2    | Se           | -0.664     | Se        | -0.661     | -0.003                   |
| 3    | In           | 0.689      | In        | 0.681      | -0.020                   |
| 4    | Se           | -0.532     | Se        | -0.491     | 0.142                    |
| 5    | In           | 0.492      | In        | 0.484      | 0.322                    |
| 6    | Se           | -0.531     | Se        | -0.496     | 0.111                    |
| 7    | Se           | -0.448     | Se        | -0.465     | 0.014                    |
| 8    | In           | 0.689      | In        | 0.681      | -0.019                   |
| 9    | Se           | -0.664     | Se        | -0.661     | -0.003                   |
| 10   | In           | 0.918      | Mo        | 0.581      | 4.756                    |
| 11   | In           | 0.688      | In        | 0.687      | 0.027                    |
| 12   | Se           | -0.531     | Se        | -0.496     | 0.110                    |
| 13   | In           | 0.492      | In        | 0.484      | 0.322                    |
| 14   | Se           | -0.531     | Se        | -0.492     | 0.142                    |
| 15   | Se           | -0.448     | Se        | -0.453     | 0.020                    |
| 16   | In           | 0.689      | In        | 0.703      | 0.035                    |
| 17   | Se           | -0.664     | Se        | -0.664     | -0.007                   |
| 18   | Se           | -0.452     | Se        | -0.452     | 0.020                    |
| 19   | In           | 0.703      | In        | 0.703      | 0.035                    |
| 20   | Se           | -0.447     | Se        | -0.447     | 0.182                    |
| 21   | In           | 0.535      | In        | 0.534      | 0.605                    |
| 22   | Se           | -0.447     | Se        | -0.447     | 0.182                    |

Table S9: Mulliken charges for pristine In<sub>10</sub>Te<sub>12</sub> QD (Table A) and Mo-doped In<sub>9</sub>Te<sub>12</sub> QD (Table B) with spin densities.

| Atom | Pristine (A) |            | Doped (B) |            |                          |
|------|--------------|------------|-----------|------------|--------------------------|
|      | Element      | Charge (e) | Element   | Charge (e) | Spin Density ( $\mu_B$ ) |
| 1    | In           | 0.435      | In        | 0.424      | 0.014                    |
| 2    | Te           | -0.481     | Te        | -0.431     | -0.001                   |
| 3    | In           | 0.435      | In        | 0.424      | 0.014                    |
| 4    | Te           | -0.404     | Te        | -0.327     | 0.164                    |
| 5    | In           | 0.433      | In        | 0.375      | 0.388                    |
| 6    | Te           | -0.404     | Te        | -0.326     | 0.164                    |
| 7    | Te           | -0.224     | Te        | -0.260     | 0.013                    |
| 8    | In           | 0.435      | In        | 0.424      | 0.015                    |
| 9    | Te           | -0.481     | Te        | -0.431     | -0.001                   |
| 10   | In           | 0.632      | Mo        | 0.360      | 4.731                    |
| 11   | In           | 0.435      | In        | 0.424      | 0.014                    |
| 12   | Te           | -0.404     | Te        | -0.326     | 0.164                    |
| 13   | In           | 0.432      | In        | 0.375      | 0.389                    |
| 14   | Te           | -0.404     | Te        | -0.326     | 0.164                    |
| 15   | Te           | -0.225     | Te        | -0.260     | 0.012                    |
| 16   | In           | 0.425      | In        | 0.425      | 0.014                    |
| 17   | Te           | -0.481     | Te        | -0.431     | -0.001                   |
| 18   | Te           | -0.224     | Te        | -0.260     | 0.012                    |
| 19   | In           | 0.425      | In        | 0.425      | 0.014                    |
| 20   | Te           | -0.404     | Te        | -0.326     | 0.164                    |
| 21   | In           | 0.433      | In        | 0.375      | 0.389                    |
| 22   | Te           | -0.404     | Te        | -0.326     | 0.163                    |

Table S10: Mulliken charges for pristine  $\text{Tl}_{10}\text{S}_{12}$  QD (Table A) and Mn-doped  $\text{Tl}_9\text{S}_{12}$  QD (Table B) with spin densities.

| Atom | Pristine (A) |            | Doped (B) |            |                          |
|------|--------------|------------|-----------|------------|--------------------------|
|      | Element      | Charge (e) | Element   | Charge (e) | Spin Density ( $\mu_B$ ) |
| 1    | Tl           | 0.818      | Tl        | 0.810      | -0.001                   |
| 2    | S            | -0.768     | S         | -0.768     | 0.057                    |
| 3    | Tl           | 0.817      | Tl        | 0.805      | 0.001                    |
| 4    | S            | -0.616     | S         | -0.598     | 0.023                    |
| 5    | Tl           | 0.630      | Tl        | 0.612      | 0.000                    |
| 6    | S            | -0.617     | S         | -0.645     | 0.011                    |
| 7    | S            | -0.590     | S         | -0.544     | 0.031                    |
| 8    | Tl           | 0.818      | Tl        | 0.831      | -0.004                   |
| 9    | S            | -0.768     | S         | -0.771     | 0.028                    |
| 10   | Tl           | 0.974      | Mn        | 0.751      | 4.742                    |
| 11   | Tl           | 0.818      | Tl        | 0.831      | -0.003                   |
| 12   | S            | -0.617     | S         | -0.545     | 0.315                    |
| 13   | Tl           | 0.631      | Tl        | 0.690      | 0.357                    |
| 14   | S            | -0.616     | S         | -0.545     | 0.315                    |
| 15   | S            | -0.589     | S         | -0.586     | 0.006                    |
| 16   | Tl           | 0.818      | Tl        | 0.810      | -0.001                   |
| 17   | S            | -0.768     | S         | -0.768     | 0.058                    |
| 18   | S            | -0.590     | S         | -0.544     | 0.031                    |
| 19   | Tl           | 0.818      | Tl        | 0.805      | 0.001                    |
| 20   | S            | -0.617     | S         | -0.598     | 0.023                    |
| 21   | Tl           | 0.632      | Tl        | 0.612      | 0.000                    |
| 22   | S            | -0.617     | S         | -0.645     | 0.011                    |

Table S11: Mulliken charges for pristine  $\text{Tl}_{10}\text{Se}_{12}$  QD (Table A) and Mn-doped  $\text{Tl}_9\text{Se}_{12}$  QD (Table B) with spin densities.

| Atom | Pristine (A) |            | Doped (B) |            |                          |
|------|--------------|------------|-----------|------------|--------------------------|
|      | Element      | Charge (e) | Element   | Charge (e) | Spin Density ( $\mu_B$ ) |
| 1    | Tl           | 0.690      | Tl        | 0.695      | 0.005                    |
| 2    | Se           | -0.676     | Se        | -0.666     | 0.041                    |
| 3    | Tl           | 0.690      | Tl        | 0.665      | -0.034                   |
| 4    | Se           | -0.549     | Se        | -0.458     | 0.344                    |
| 5    | Tl           | 0.579      | Tl        | 0.583      | 0.115                    |
| 6    | Se           | -0.549     | Se        | -0.558     | 0.066                    |
| 7    | Se           | -0.463     | Se        | -0.409     | 0.075                    |
| 8    | Tl           | 0.690      | Tl        | 0.665      | -0.034                   |
| 9    | Se           | -0.676     | Se        | -0.666     | 0.041                    |
| 10   | Tl           | 0.835      | Mn        | 0.663      | 4.731                    |
| 11   | Tl           | 0.690      | Tl        | 0.695      | 0.005                    |
| 12   | Se           | -0.549     | Se        | -0.558     | 0.066                    |
| 13   | Tl           | 0.579      | Tl        | 0.583      | 0.115                    |
| 14   | Se           | -0.549     | Se        | -0.458     | 0.344                    |
| 15   | Se           | -0.464     | Se        | -0.458     | 0.012                    |
| 16   | Tl           | 0.689      | Tl        | 0.684      | 0.001                    |
| 17   | Se           | -0.676     | Se        | -0.678     | 0.058                    |
| 18   | Se           | -0.464     | Se        | -0.458     | 0.012                    |
| 19   | Tl           | 0.689      | Tl        | 0.684      | 0.001                    |
| 20   | Se           | -0.549     | Se        | -0.553     | 0.019                    |
| 21   | Tl           | 0.581      | Tl        | 0.562      | -0.001                   |
| 22   | Se           | -0.549     | Se        | -0.553     | 0.019                    |

Table S12: Mulliken charges for pristine Tl<sub>10</sub>Te<sub>12</sub> QD (Table A) and Mn-doped Tl<sub>9</sub>Te<sub>12</sub> QD (Table B) with spin densities.

| Atom | Pristine (A) |            | Doped (B) |            |                          |
|------|--------------|------------|-----------|------------|--------------------------|
|      | Element      | Charge (e) | Element   | Charge (e) | Spin Density ( $\mu_B$ ) |
| 1    | Tl           | 0.499      | Tl        | 0.498      | 0.000                    |
| 2    | Te           | -0.548     | Te        | -0.483     | 0.044                    |
| 3    | Tl           | 0.499      | Tl        | 0.491      | 0.003                    |
| 4    | Te           | -0.452     | Te        | -0.456     | 0.019                    |
| 5    | Tl           | 0.538      | Tl        | 0.524      | -0.002                   |
| 6    | Te           | -0.453     | Te        | -0.477     | 0.014                    |
| 7    | Te           | -0.293     | Te        | -0.285     | 0.026                    |
| 8    | Tl           | 0.498      | Tl        | 0.535      | 0.027                    |
| 9    | Te           | -0.547     | Te        | -0.451     | 0.027                    |
| 10   | Tl           | 0.626      | Mn        | 0.332      | 4.742                    |
| 11   | Tl           | 0.499      | Tl        | 0.536      | 0.027                    |
| 12   | Te           | -0.453     | Te        | -0.456     | -0.533                   |
| 13   | Tl           | 0.539      | Tl        | 0.661      | 0.028                    |
| 14   | Te           | -0.453     | Te        | -0.456     | -0.534                   |
| 15   | Te           | -0.292     | Te        | -0.322     | 0.008                    |
| 16   | Tl           | 0.498      | Tl        | 0.498      | 0.000                    |
| 17   | Te           | -0.547     | Te        | -0.483     | 0.044                    |
| 18   | Te           | -0.293     | Te        | -0.285     | 0.026                    |
| 19   | Tl           | 0.499      | Tl        | 0.491      | 0.003                    |
| 20   | Te           | -0.452     | Te        | -0.456     | 0.019                    |
| 21   | Tl           | 0.539      | Tl        | 0.523      | -0.002                   |
| 22   | Te           | -0.453     | Te        | -0.477     | 0.014                    |

# Mulliken Population Analysis of Anionic Pristine and Transition-Metal-Doped PTMC Quantum Dots

Table S13: Mulliken charges for pristine Ga<sub>10</sub>S<sub>12</sub> QD (Table A) and Zr-doped Ga<sub>9</sub>S<sub>12</sub> QD (Table B) with spin densities.

| Atom | Pristine (A) |            | Doped (B) |            |                          |
|------|--------------|------------|-----------|------------|--------------------------|
|      | Element      | Charge (e) | Element   | Charge (e) | Spin Density ( $\mu_B$ ) |
| 1    | Ga           | 0.680      | Ga        | 0.628      | 0.017                    |
| 2    | S            | -0.705     | S         | -0.687     | -0.021                   |
| 3    | Ga           | 0.680      | Ga        | 0.695      | 0.021                    |
| 4    | S            | -0.624     | S         | -0.595     | 0.012                    |
| 5    | Ga           | 0.344      | Ga        | 0.353      | 0.002                    |
| 6    | S            | -0.624     | S         | -0.669     | 0.010                    |
| 7    | S            | -0.615     | S         | -0.738     | -0.018                   |
| 8    | Ga           | 0.680      | Ga        | 0.695      | 0.021                    |
| 9    | S            | -0.705     | S         | -0.687     | -0.021                   |
| 10   | Ga           | 0.590      | Zr        | 0.865      | 1.971                    |
| 11   | Ga           | 0.680      | Ga        | 0.628      | 0.017                    |
| 12   | S            | -0.624     | S         | -0.669     | 0.010                    |
| 13   | Ga           | 0.344      | Ga        | 0.353      | 0.002                    |
| 14   | S            | -0.624     | S         | -0.595     | 0.012                    |
| 15   | S            | -0.615     | S         | -0.549     | 0.130                    |
| 16   | Ga           | 0.680      | Ga        | 0.540      | 0.701                    |
| 17   | S            | -0.705     | S         | -0.727     | 0.106                    |
| 18   | S            | -0.615     | S         | -0.549     | 0.130                    |
| 19   | Ga           | 0.680      | Ga        | 0.540      | 0.701                    |
| 20   | S            | -0.624     | S         | -0.581     | 0.247                    |
| 21   | Ga           | 0.343      | Ga        | 0.328      | 0.702                    |
| 22   | S            | -0.624     | S         | -0.581     | 0.247                    |

Table S14: Mulliken charges for pristine Ga<sub>10</sub>Se<sub>12</sub> QD (Table A) and Mo-doped Ga<sub>9</sub>Se<sub>12</sub> QD (Table B) with spin densities.

| Atom | Pristine (A) |            | Doped (B) |            |                          |
|------|--------------|------------|-----------|------------|--------------------------|
|      | Element      | Charge (e) | Element   | Charge (e) | Spin Density ( $\mu_B$ ) |
| 1    | Ga           | 0.535      | Ga        | 0.521      | 0.023                    |
| 2    | Se           | -0.605     | Se        | -0.576     | 0.007                    |
| 3    | Ga           | 0.536      | Ga        | 0.521      | 0.023                    |
| 4    | Se           | -0.554     | Se        | -0.555     | 0.017                    |
| 5    | Ga           | 0.280      | Ga        | 0.271      | -0.001                   |
| 6    | Se           | -0.554     | Se        | -0.556     | 0.017                    |
| 7    | Se           | -0.485     | Se        | -0.460     | 0.002                    |
| 8    | Ga           | 0.536      | Ga        | 0.521      | 0.023                    |
| 9    | Se           | -0.605     | Se        | -0.576     | 0.007                    |
| 10   | Ga           | 0.537      | Mo        | 0.502      | 4.737                    |
| 11   | Ga           | 0.535      | Ga        | 0.521      | 0.023                    |
| 12   | Se           | -0.554     | Se        | -0.556     | 0.017                    |
| 13   | Ga           | 0.280      | Ga        | 0.271      | -0.001                   |
| 14   | Se           | -0.554     | Se        | -0.555     | 0.017                    |
| 15   | Se           | -0.485     | Se        | -0.460     | 0.002                    |
| 16   | Ga           | 0.536      | Ga        | 0.521      | 0.023                    |
| 17   | Se           | -0.605     | Se        | -0.576     | 0.007                    |
| 18   | Se           | -0.485     | Se        | -0.460     | 0.002                    |
| 19   | Ga           | 0.536      | Ga        | 0.521      | 0.023                    |
| 20   | Se           | -0.554     | Se        | -0.555     | 0.017                    |
| 21   | Ga           | 0.280      | Ga        | 0.271      | -0.001                   |
| 22   | Se           | -0.554     | Se        | -0.555     | 0.017                    |

Table S15: Mulliken charges for pristine Ga<sub>10</sub>Te<sub>12</sub> QD (Table A) and Mo-doped Ga<sub>9</sub>Te<sub>12</sub> QD (Table B) with spin densities.

| Atom | Pristine (A) |            | Doped (B) |            |                          |
|------|--------------|------------|-----------|------------|--------------------------|
|      | Element      | Charge (e) | Element   | Charge (e) | Spin Density ( $\mu_B$ ) |
| 1    | Ga           | 0.269      | Ga        | 0.249      | 0.022                    |
| 2    | Te           | -0.425     | Te        | -0.324     | 0.006                    |
| 3    | Ga           | 0.269      | Ga        | 0.249      | 0.022                    |
| 4    | Te           | -0.427     | Te        | -0.431     | 0.022                    |
| 5    | Ga           | 0.205      | Ga        | 0.192      | -0.002                   |
| 6    | Te           | -0.427     | Te        | -0.431     | 0.022                    |
| 7    | Te           | -0.287     | Te        | -0.250     | 0.003                    |
| 8    | Ga           | 0.269      | Ga        | 0.249      | 0.022                    |
| 9    | Te           | -0.425     | Te        | -0.324     | 0.006                    |
| 10   | Ga           | 0.467      | Mo        | 0.240      | 4.716                    |
| 11   | Ga           | 0.269      | Ga        | 0.249      | 0.022                    |
| 12   | Te           | -0.427     | Te        | -0.431     | 0.022                    |
| 13   | Ga           | 0.205      | Ga        | 0.192      | -0.002                   |
| 14   | Te           | -0.427     | Te        | -0.431     | 0.022                    |
| 15   | Te           | -0.287     | Te        | -0.250     | 0.003                    |
| 16   | Ga           | 0.269      | Ga        | 0.248      | 0.022                    |
| 17   | Te           | -0.425     | Te        | -0.324     | 0.006                    |
| 18   | Te           | -0.287     | Te        | -0.250     | 0.003                    |
| 19   | Ga           | 0.269      | Ga        | 0.248      | 0.022                    |
| 20   | Te           | -0.427     | Te        | -0.430     | 0.022                    |
| 21   | Ga           | 0.205      | Ga        | 0.192      | -0.002                   |
| 22   | Te           | -0.427     | Te        | -0.430     | 0.022                    |

Table S16: Mulliken charges for pristine In<sub>10</sub>S<sub>12</sub> QD (Table A) and Zr-doped In<sub>9</sub>S<sub>12</sub> QD (Table B) with spin densities.

| Atom | Pristine (A) |            | Doped (B) |            |                          |
|------|--------------|------------|-----------|------------|--------------------------|
|      | Element      | Charge (e) | Element   | Charge (e) | Spin Density ( $\mu_B$ ) |
| 1    | In           | 0.816      | In        | 0.804      | 0.028                    |
| 2    | S            | -0.790     | S         | -0.810     | -0.011                   |
| 3    | In           | 0.816      | In        | 0.804      | 0.027                    |
| 4    | S            | -0.693     | S         | -0.693     | 0.011                    |
| 5    | In           | 0.378      | In        | 0.377      | 0.003                    |
| 6    | S            | -0.693     | S         | -0.693     | 0.011                    |
| 7    | S            | -0.707     | S         | -0.673     | 0.022                    |
| 8    | In           | 0.816      | In        | 0.804      | 0.028                    |
| 9    | S            | -0.790     | S         | -0.810     | -0.011                   |
| 10   | In           | 0.616      | Zr        | 0.651      | 2.728                    |
| 11   | In           | 0.816      | In        | 0.804      | 0.028                    |
| 12   | S            | -0.693     | S         | -0.692     | 0.011                    |
| 13   | In           | 0.378      | In        | 0.377      | 0.003                    |
| 14   | S            | -0.693     | S         | -0.692     | 0.011                    |
| 15   | S            | -0.707     | S         | -0.673     | 0.022                    |
| 16   | In           | 0.816      | In        | 0.804      | 0.028                    |
| 17   | S            | -0.790     | S         | -0.810     | -0.011                   |
| 18   | S            | -0.707     | S         | -0.673     | 0.022                    |
| 19   | In           | 0.816      | In        | 0.804      | 0.027                    |
| 20   | S            | -0.693     | S         | -0.693     | 0.011                    |
| 21   | In           | 0.378      | In        | 0.377      | 0.003                    |
| 22   | S            | -0.693     | S         | -0.693     | 0.011                    |

Table S17: Mulliken charges for pristine In<sub>10</sub>Se<sub>12</sub> QD (Table A) and Mo-doped In<sub>9</sub>Se<sub>12</sub> QD (Table B) with spin densities.

| Atom | Pristine (A) |            | Doped (B) |            |                          |
|------|--------------|------------|-----------|------------|--------------------------|
|      | Element      | Charge (e) | Element   | Charge (e) | Spin Density ( $\mu_B$ ) |
| 1    | In           | 0.664      | In        | 0.647      | 0.023                    |
| 2    | Se           | -0.697     | Se        | -0.661     | -0.004                   |
| 3    | In           | 0.665      | In        | 0.647      | 0.023                    |
| 4    | Se           | -0.620     | Se        | -0.619     | 0.019                    |
| 5    | In           | 0.328      | In        | 0.317      | -0.001                   |
| 6    | Se           | -0.619     | Se        | -0.619     | 0.019                    |
| 7    | Se           | -0.579     | Se        | -0.549     | 0.004                    |
| 8    | In           | 0.665      | In        | 0.647      | 0.023                    |
| 9    | Se           | -0.697     | Se        | -0.661     | -0.004                   |
| 10   | In           | 0.575      | Mo        | 0.511      | 4.754                    |
| 11   | In           | 0.665      | In        | 0.647      | 0.023                    |
| 12   | Se           | -0.619     | Se        | -0.619     | 0.019                    |
| 13   | In           | 0.328      | In        | 0.317      | -0.001                   |
| 14   | Se           | -0.619     | Se        | -0.619     | 0.019                    |
| 15   | Se           | -0.579     | Se        | -0.549     | 0.004                    |
| 16   | In           | 0.665      | In        | 0.647      | 0.023                    |
| 17   | Se           | -0.697     | Se        | -0.661     | -0.004                   |
| 18   | Se           | -0.579     | Se        | -0.549     | 0.004                    |
| 19   | In           | 0.664      | In        | 0.647      | 0.023                    |
| 20   | Se           | -0.619     | Se        | -0.619     | 0.019                    |
| 21   | In           | 0.328      | In        | 0.317      | -0.001                   |
| 22   | Se           | -0.619     | Se        | -0.619     | 0.019                    |

Table S18: Mulliken charges for pristine In<sub>10</sub>Te<sub>12</sub> QD (Table A) and Mo-doped In<sub>9</sub>Te<sub>12</sub> QD (Table B) with spin densities.

| Atom | Pristine (A) |            | Doped (B) |            |                          |
|------|--------------|------------|-----------|------------|--------------------------|
|      | Element      | Charge (e) | Element   | Charge (e) | Spin Density ( $\mu_B$ ) |
| 1    | In           | 0.427      | In        | 0.404      | 0.023                    |
| 2    | Te           | -0.542     | Te        | -0.435     | -0.003                   |
| 3    | In           | 0.426      | In        | 0.405      | 0.023                    |
| 4    | Te           | -0.516     | Te        | -0.517     | 0.020                    |
| 5    | In           | 0.283      | In        | 0.265      | -0.002                   |
| 6    | Te           | -0.516     | Te        | -0.517     | 0.020                    |
| 7    | Te           | -0.406     | Te        | -0.368     | 0.007                    |
| 8    | In           | 0.426      | In        | 0.404      | 0.023                    |
| 9    | Te           | -0.542     | Te        | -0.435     | -0.003                   |
| 10   | In           | 0.536      | Mo        | 0.291      | 4.738                    |
| 11   | In           | 0.426      | In        | 0.404      | 0.023                    |
| 12   | Te           | -0.516     | Te        | -0.517     | 0.020                    |
| 13   | In           | 0.282      | In        | 0.265      | -0.002                   |
| 14   | Te           | -0.516     | Te        | -0.517     | 0.020                    |
| 15   | Te           | -0.406     | Te        | -0.367     | 0.006                    |
| 16   | In           | 0.426      | In        | 0.404      | 0.023                    |
| 17   | Te           | -0.541     | Te        | -0.435     | -0.003                   |
| 18   | Te           | -0.406     | Te        | -0.367     | 0.006                    |
| 19   | In           | 0.426      | In        | 0.404      | 0.023                    |
| 20   | Te           | -0.516     | Te        | -0.517     | 0.020                    |
| 21   | In           | 0.282      | In        | 0.265      | -0.002                   |
| 22   | Te           | -0.516     | Te        | -0.517     | 0.020                    |

Table S19: Mulliken charges for pristine  $\text{Tl}_{10}\text{S}_{12}$  QD (Table A) and Mn-doped  $\text{Tl}_9\text{S}_{12}$  QD (Table B) with spin densities.

| Atom | Pristine (A) |            | Doped (B) |            |                          |
|------|--------------|------------|-----------|------------|--------------------------|
|      | Element      | Charge (e) | Element   | Charge (e) | Spin Density ( $\mu_B$ ) |
| 1    | Tl           | 0.772      | Tl        | 0.737      | 0.003                    |
| 2    | S            | -0.801     | S         | -0.754     | 0.043                    |
| 3    | Tl           | 0.772      | Tl        | 0.766      | 0.003                    |
| 4    | S            | -0.708     | S         | -0.683     | 0.016                    |
| 5    | Tl           | 0.475      | Tl        | 0.464      | 0.003                    |
| 6    | S            | -0.708     | S         | -0.741     | 0.025                    |
| 7    | S            | -0.688     | S         | -0.635     | 0.008                    |
| 8    | Tl           | 0.772      | Tl        | 0.767      | 0.002                    |
| 9    | S            | -0.801     | S         | -0.776     | 0.041                    |
| 10   | Tl           | 0.661      | Mn        | 0.647      | 4.750                    |
| 11   | Tl           | 0.772      | Tl        | 0.771      | -0.000229                |
| 12   | S            | -0.708     | S         | -0.707     | 0.010                    |
| 13   | Tl           | 0.475      | Tl        | 0.477      | -0.001                   |
| 14   | S            | -0.708     | S         | -0.698     | 0.014                    |
| 15   | S            | -0.688     | S         | -0.679     | 0.112                    |
| 16   | Tl           | 0.772      | Tl        | 0.624      | 0.166                    |
| 17   | S            | -0.801     | S         | -0.719     | 0.104                    |
| 18   | S            | -0.688     | S         | -0.632     | 0.012                    |
| 19   | Tl           | 0.772      | Tl        | 0.741      | 0.008                    |
| 20   | S            | -0.708     | S         | -0.698     | 0.023                    |
| 21   | Tl           | 0.475      | Tl        | 0.426      | 0.002                    |
| 22   | S            | -0.708     | S         | -0.696     | 0.656                    |

Table S20: Mulliken charges for pristine Tl<sub>10</sub>Se<sub>12</sub> QD (Table A) and Mn-doped Tl<sub>9</sub>Se<sub>12</sub> QD (Table B) with spin densities.

| Atom | Pristine (A) |            | Doped (B) |            |                          |
|------|--------------|------------|-----------|------------|--------------------------|
|      | Element      | Charge (e) | Element   | Charge (e) | Spin Density ( $\mu_B$ ) |
| 1    | Tl           | 0.652      | Tl        | 0.616      | -0.002                   |
| 2    | Se           | -0.725     | Se        | -0.677     | 0.056                    |
| 3    | Tl           | 0.652      | Tl        | 0.601      | 0.113                    |
| 4    | Se           | -0.650     | Se        | -0.677     | 0.344                    |
| 5    | Tl           | 0.432      | Tl        | 0.393      | 0.018                    |
| 6    | Se           | -0.650     | Se        | -0.639     | 0.018                    |
| 7    | Se           | -0.587     | Se        | -0.593     | 0.016                    |
| 8    | Tl           | 0.652      | Tl        | 0.601      | 0.113                    |
| 9    | Se           | -0.725     | Se        | -0.677     | 0.056                    |
| 10   | Tl           | 0.628      | Mn        | 0.559      | 4.784                    |
| 11   | Tl           | 0.652      | Tl        | 0.616      | -0.002                   |
| 12   | Se           | -0.650     | Se        | -0.639     | 0.018                    |
| 13   | Tl           | 0.432      | Tl        | 0.393      | 0.018                    |
| 14   | Se           | -0.650     | Se        | -0.677     | 0.344                    |
| 15   | Se           | -0.587     | Se        | -0.514     | 0.295                    |
| 16   | Tl           | 0.652      | Tl        | 0.575      | 0.162                    |
| 17   | Se           | -0.725     | Se        | -0.629     | -0.051                   |
| 18   | Se           | -0.587     | Se        | -0.514     | 0.295                    |
| 19   | Tl           | 0.652      | Tl        | 0.575      | 0.162                    |
| 20   | Se           | -0.650     | Se        | -0.583     | 0.522                    |
| 21   | Tl           | 0.432      | Tl        | 0.474      | 0.201                    |
| 22   | Se           | -0.650     | Se        | -0.583     | 0.522                    |

Table S21: Mulliken charges for pristine  $\text{Tl}_{10}\text{Te}_{12}$  QD (Table A) and Mn-doped  $\text{Tl}_9\text{Te}_{12}$  QD (Table B) with spin densities.

| Atom | Pristine (A) |            | Doped (B) |            |                          |
|------|--------------|------------|-----------|------------|--------------------------|
|      | Element      | Charge (e) | Element   | Charge (e) | Spin Density ( $\mu_B$ ) |
| 1    | Tl           | 0.469      | Tl        | 0.462      | 0.038                    |
| 2    | Te           | -0.614     | Te        | -0.475     | -0.033                   |
| 3    | Tl           | 0.469      | Tl        | 0.461      | 0.032                    |
| 4    | Te           | -0.575     | Te        | -0.584     | 0.117                    |
| 5    | Tl           | 0.405      | Tl        | 0.382      | -0.005                   |
| 6    | Te           | -0.575     | Te        | -0.586     | 0.130                    |
| 7    | Te           | -0.450     | Te        | -0.417     | 0.112                    |
| 8    | Tl           | 0.469      | Tl        | 0.462      | 0.032                    |
| 9    | Te           | -0.614     | Te        | -0.476     | -0.033                   |
| 10   | Tl           | 0.612      | Mn        | 0.266      | 4.862                    |
| 11   | Tl           | 0.469      | Tl        | 0.462      | 0.037                    |
| 12   | Te           | -0.575     | Te        | -0.586     | 0.128                    |
| 13   | Tl           | 0.405      | Tl        | 0.382      | -0.005                   |
| 14   | Te           | -0.575     | Te        | -0.584     | 0.116                    |
| 15   | Te           | -0.450     | Te        | -0.418     | 0.112                    |
| 16   | Tl           | 0.469      | Tl        | 0.464      | 0.028                    |
| 17   | Te           | -0.614     | Te        | -0.481     | -0.026                   |
| 18   | Te           | -0.450     | Te        | -0.418     | 0.111                    |
| 19   | Tl           | 0.469      | Tl        | 0.464      | 0.028                    |
| 20   | Te           | -0.575     | Te        | -0.582     | 0.112                    |
| 21   | Tl           | 0.405      | Tl        | 0.382      | -0.005                   |
| 22   | Te           | -0.575     | Te        | -0.582     | 0.113                    |

## 9 Analysis of Vibrational Response

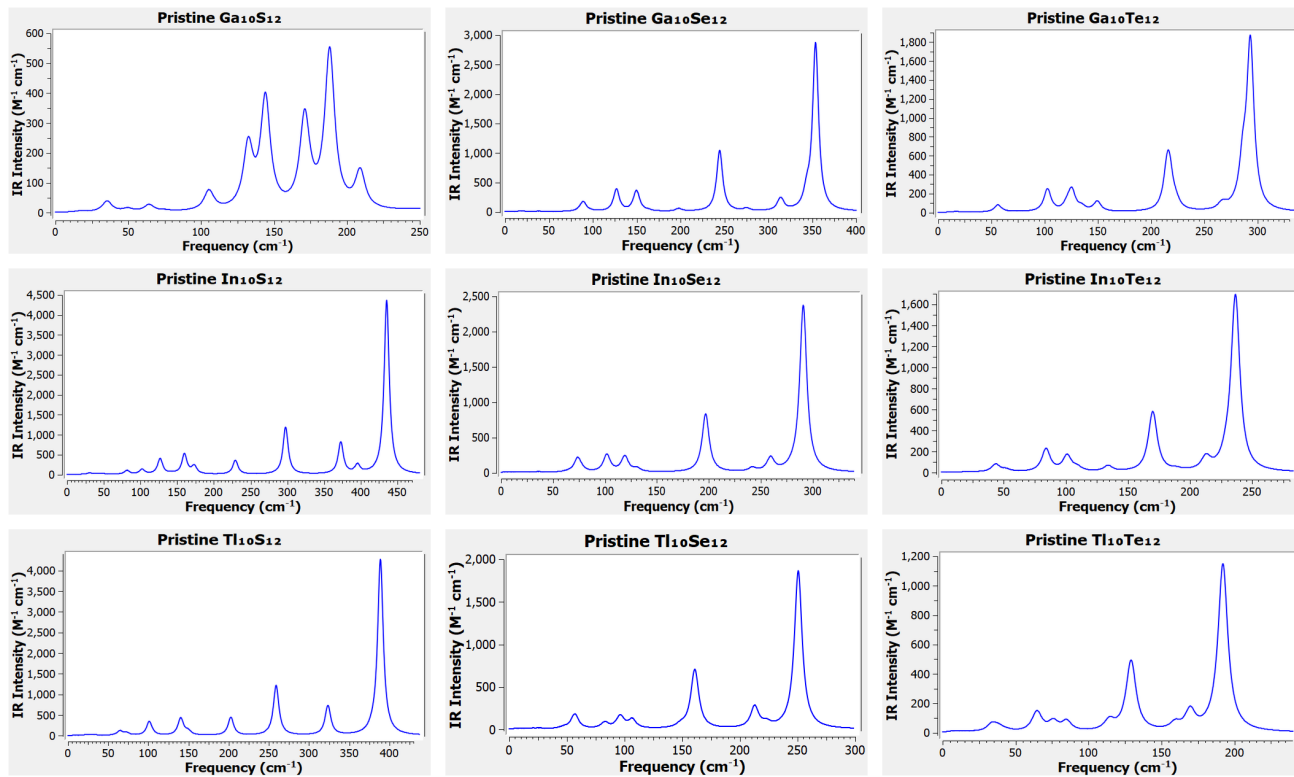

S3(a)

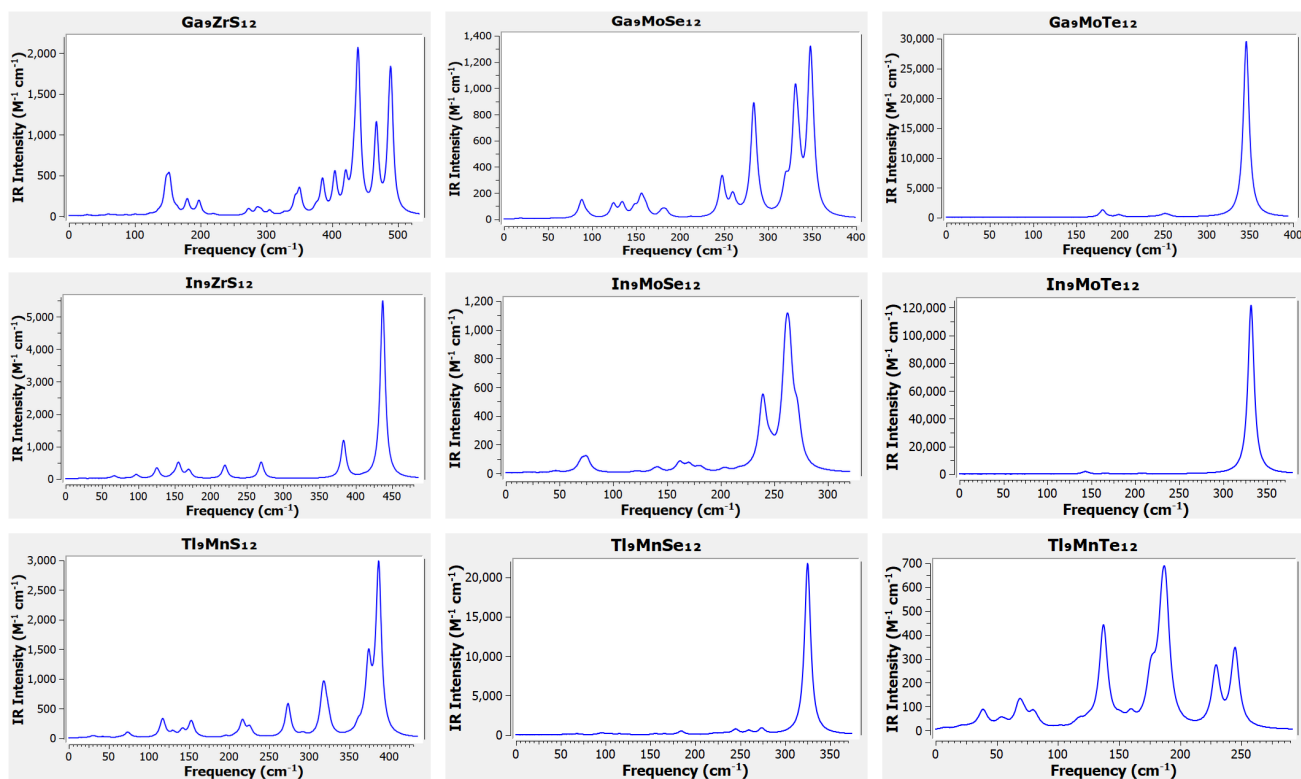

S3(b)

Figure S3(a–b): The IR spectra of the pristine and center-substituted configurations are presented for each of the group. This analysis shows that all the vibrational frequencies are real, with no imaginary vibrations, which ensures the systems occupy stable minima on the potential energy landscape and indicates structural stability.

# 10 Energy Landscape under Finite-Temperature Perturbations

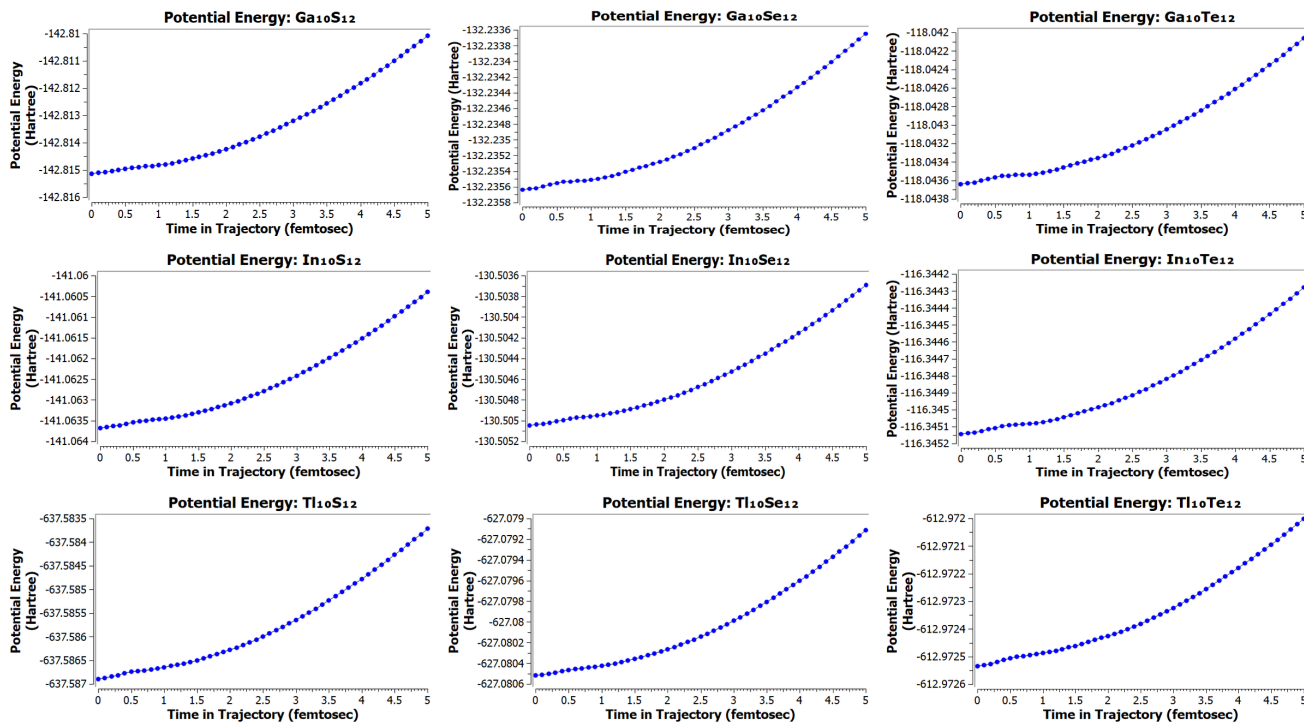

S4(a)

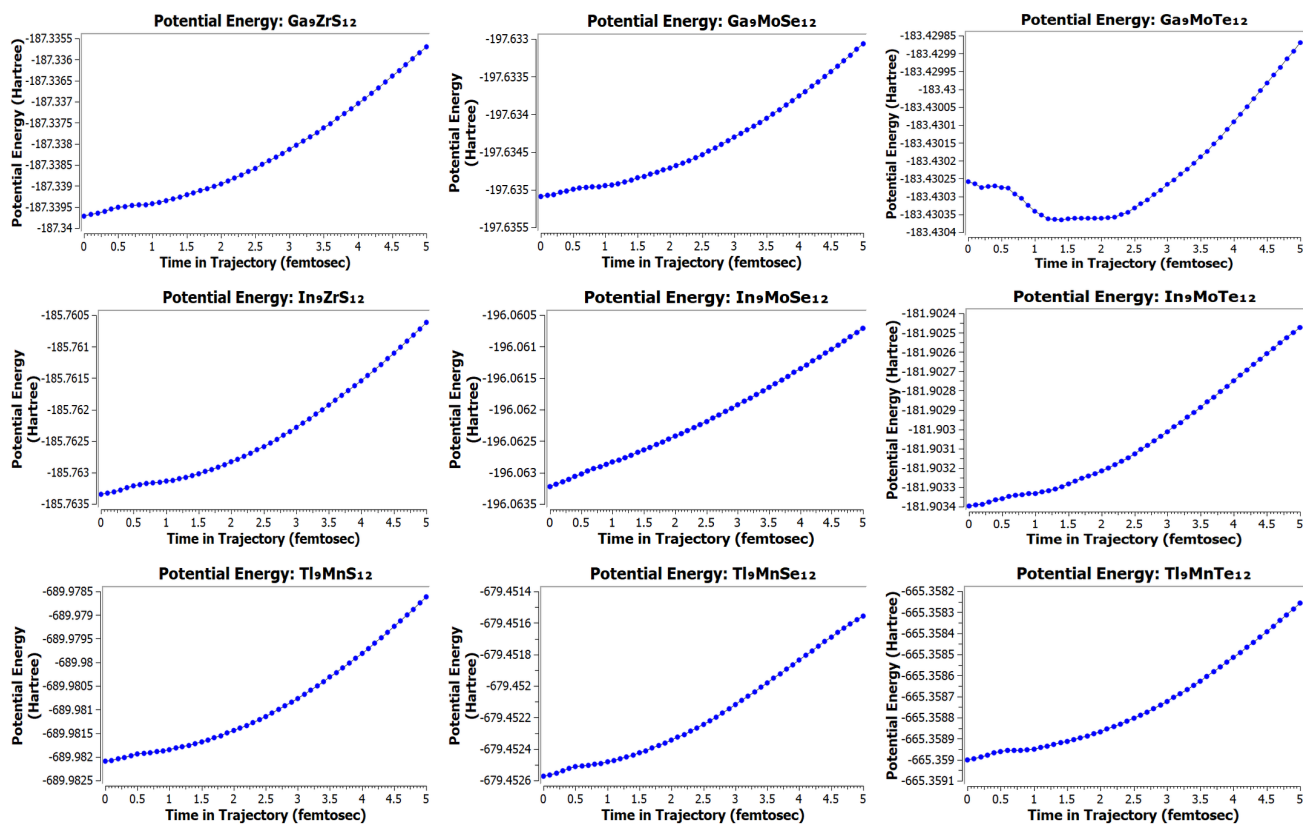

S4(b)

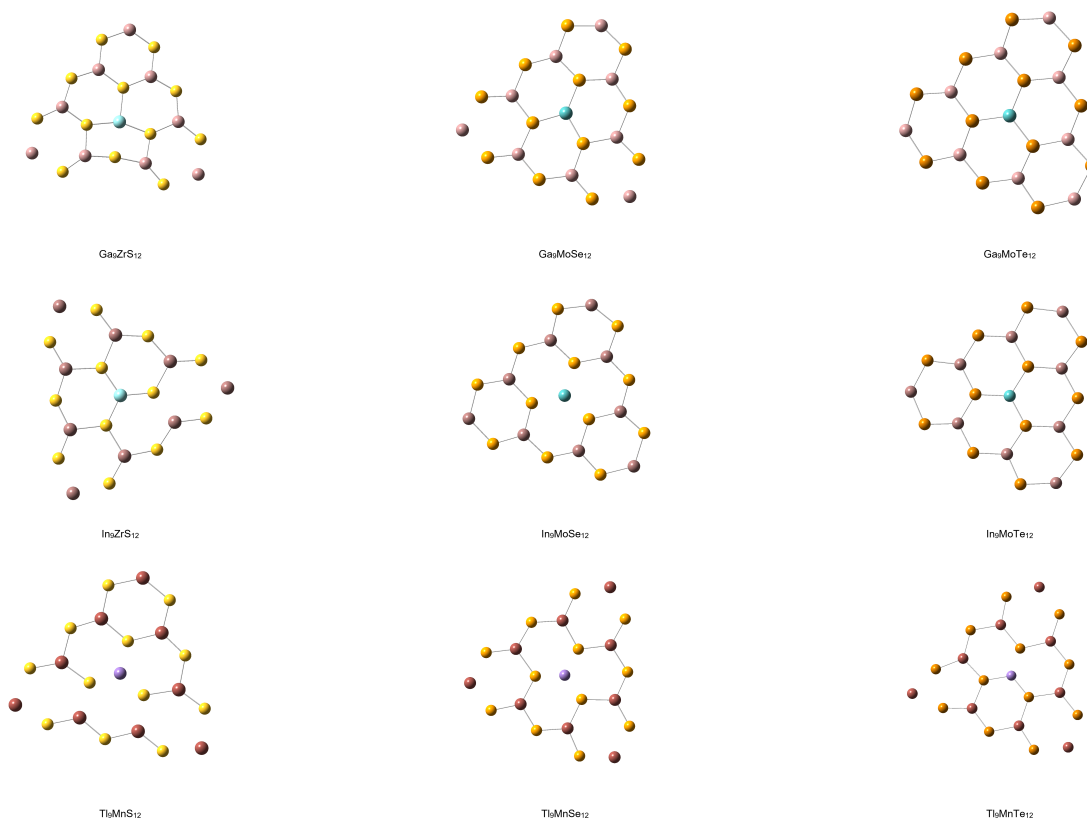

S4(c)

Figure S4(a–c): The ab initio molecular dynamics (AIMD) simulations were performed at an instantaneous temperature of 300 K (room temperature) to study the thermal stability of the configurations, i.e., how the potential energy change over a finite time (5 femtoseconds). As depicted, the changes in potential energies are very small and show smooth variations, with no sudden, large or abrupt fluctuations in energy or geometry. This suggests that the considered systems are thermally stable within the studied temperature range. During the simulation, some bonds present in the initial geometry are no longer observed in the final structure. This is due to thermal fluctuations and structural relaxation, which allow the system to reach a lower-energy configuration. These atoms remain physically interacting, with few covalent bonds are effectively elongated, as also observed from the bond-length vs. time analysis.

## 11 Structural Data Availability

The optimized molecular structures of all nanodots studied in this work are provided in `.mol` format and deposited on Zenodo at Chowdhury, S. M., & Akther, S. (2025). *Molecular Structure Files for Spin-Selective Orbital Reconfiguration and Colossal Nonlinear Anisotropy in Defect-Engineered Atomically Thin Quantum Dots*. Zenodo. <https://doi.org/10.5281/zenodo.16269514>

## References

- [1] Chai, J.-D.; Head-Gordon, M. Long-range corrected hybrid density functionals with damped atom–atom dispersion corrections. *Physical Chemistry Chemical Physics* 2008, 10 (44), 6615. <https://doi.org/10.1039/b810189b>.
- [2] Hay, P. J.; Wadt, W. R. Ab Initio Effective Core Potentials for Molecular Calculations. Potentials for the Transition Metal Atoms Sc to Hg. *J. Chem. Phys.* 1985, 82 (1), 270–283. <https://doi.org/10.1063/1.448799>.
- [3] Gauss, J.; Ruud, K.; Helgaker, T. Perturbation-dependent atomic orbitals for the calculation of spin-rotation constants and rotational g tensors. *The Journal of Chemical Physics* 1996, 105 (7), 2804–2812. <https://doi.org/10.1063/1.472143>.
- [4] Kurtz, H. A.; Stewart, J. J. P.; Dieter, K. M. Calculation of the nonlinear optical properties of molecules. *J. Comput. Chem.* 1990, 11 (1), 82–87. <https://doi.org/10.1002/jcc.540110111>.
